# Supplementary material
Source: PubMed Central journal article supplement (PMC6632121)
Supplement: jamainternmed-179-1242-s001.pdf [file jamainternmed-179-1242-s001.pdf]

1  
2  
3  
4  
5 **CLINICAL TRIAL PROTOCOL**

6  
7 **AN RCT OF CANNABINOID REPLACEMENT THERAPY (SATIVEX®) FOR THE MANAGEMENT OF**  
8 **TREATMENT-RESISTANT CANNABIS DEPENDENT PATIENTS**

9  
10 **Protocol number:** 1.4

11 **Date Amended:** 2015 1 December 2015

12  
13 **Universal Trial Number:** TBA

14 **ANZCTR registration number:** TBA

15  
16  
17 **Trial Coordinator:** Dr David Allsop

18 **CALL DIRECTLY FOR ANY PROTOCOL RELATED QUESTIONS (mobile): 0405189190**

19 Dr David Allsop

20 ✉: Psychopharmacology Laboratory, School of Psychology, The University of Sydney, Room 242 Top South Badham,  
21 Sydney, NSW, 2006, Australia

22 ☎: +61 2 9351 3372    Mobile: +61 (0) 405189190

23 📧: +61 2 9036 5223    [david.allsop@sydney.edu.au](mailto:david.allsop@sydney.edu.au)

24  
25  
26 **Sponsor:**

27 University of Sydney

28 ✉: The University of Sydney, SYDNEY, NSW 2006, AUSTRALIA

29 ☎: +61 2 9351 7124

30  
31  
32 **Sponsor delegate signature (CIA):**

33 (Associate Professor Nicholas Lintzeris; MOBILE: 0419261675)

34  
35  
36 **Site Investigator Signature – Langton Centre (CIA):**

37 (Ass. Prof. Nicholas Lintzeris; MOBILE: 0431585515)

38  
39  
40 **Site Investigator Signature – Hunter New England Clinical Drug and Alcohol Services (Newcastle cannabis**  
41 **clinic (CIE)):**

42 (Ass. Prof. Adrian Dunlop; MOBILE: 0423568178)

43  
44  
45 **Site Investigator Signature – Centre for Addiction Medicine, Westmead (AI):**

46 (Dr. Nghi Phung; MOBILE: 0414 674 864)

47  
48  
49  
50  
51  
52

**TABLE OF CONTENTS**

|     |                                                                       |    |
|-----|-----------------------------------------------------------------------|----|
| 53  | <b>TABLE OF CONTENTS</b>                                              |    |
| 54  | ABBREVIATIONS .....                                                   | 4  |
| 55  | 1 GENERAL INFORMATION .....                                           | 5  |
| 56  | 1.1 SYNOPSIS .....                                                    | 5  |
| 57  | 1.2 Investigators.....                                                | 6  |
| 58  | 1.2.1 Chief Investigators (CIs) .....                                 | 6  |
| 59  | 1.2.2 Associate Investigators (CIs) .....                             | 7  |
| 60  | 1.3 Study physicians .....                                            | 7  |
| 61  | 1.4 Other personnel .....                                             | 8  |
| 62  | 1.5 Persons authorised to sign protocol and protocol amendments ..... | 9  |
| 63  | 1.6 Trial site.....                                                   | 9  |
| 64  | 1.6.1 Clinical .....                                                  | 9  |
| 65  | 1.6.2 Laboratory.....                                                 | 10 |
| 66  | 1.7 Pharmacy .....                                                    | 10 |
| 67  | 1.8 Blood and Urine Sampling and Storage Services .....               | 10 |
| 68  | 2 BACKGROUND INFORMATION .....                                        | 11 |
| 69  | 2.1 Treating cannabis dependence .....                                | 11 |
| 70  | 2.2 The case for agonist treatment for cannabis dependence .....      | 12 |
| 71  | 2.3 The rationale for sativex in treating cannabis dependence.....    | 12 |
| 72  | 2.4 Safety and abuse liability of sativex .....                       | 13 |
| 73  | 2.5 Potential risks and benefits to human subjects .....              | 14 |
| 74  | 2.6 Trial conduct .....                                               | 16 |
| 75  | 3 TRIAL DESIGN .....                                                  | 16 |
| 76  | 3.1 OBJECTIVES .....                                                  | 16 |
| 77  | 3.1.1 Primary objectives.....                                         | 16 |
| 78  | 3.1.2 Secondary objectives .....                                      | 17 |
| 79  | 3.2 Design.....                                                       | 17 |
| 80  | 3.3 Study Outcome Measures.....                                       | 17 |
| 81  | 3.3.1 Research Interviews.....                                        | 17 |
| 82  | 3.3.2 Outcome assessment .....                                        | 17 |
| 83  | 3.3.3 Primary outcomes.....                                           | 18 |
| 84  | 3.3.4 Secondary outcomes.....                                         | 19 |
| 85  | 3.4 Study population .....                                            | 19 |
| 86  | 3.4.1 Subject Numbers and power calculations .....                    | 19 |
| 87  | 3.5 Recruitment procedures .....                                      | 21 |
| 88  | 3.5.1 Eligibility assessment: telephone screening .....               | 22 |
| 89  | 3.5.2 Medical eligibility assessment day (2-3 hours) .....            | 22 |
| 90  | 3.6 Informed consent.....                                             | 24 |
| 91  | 3.7 Randomisation and blinding .....                                  | 24 |
| 92  | 3.8 Trial interventions .....                                         | 25 |
| 93  | 3.8.1 Study sites .....                                               | 25 |
| 94  | 3.8.2 Trial medications: Sativex and placebo.....                     | 25 |
| 95  | 3.8.3 Adjunct medications: Nicotine Replacement Therapy .....         | 32 |
| 96  | 3.8.4 Psychosocial interventions.....                                 | 32 |
| 97  | 3.8.5 Clinical reviews, case management and monitoring .....          | 32 |
| 98  | 3.8.6 Clinical care beyond medication phase. ....                     | 33 |
| 99  | 3.9 Urinalysis and blood pathology testing.....                       | 33 |
| 100 | 3.10 Cognitive Testing.....                                           | 33 |
| 101 | 3.11 Health Economics Data section.....                               | 35 |
| 102 | 3.12 Participant satisfaction with medication and test of blind ..... | 35 |
| 103 | 3.13 Research Interviews (~1.5 hours) .....                           | 35 |
| 104 | 3.13.1 Enhancing research follow-up.....                              | 36 |
| 105 | 3.13.2 Remuneration of participants .....                             | 36 |
| 106 | 3.14 Discontinuation criteria.....                                    | 36 |
| 107 | 3.14.1 Involuntary termination .....                                  | 36 |

|     |        |                                                                          |    |
|-----|--------|--------------------------------------------------------------------------|----|
| 108 | 3.14.2 | Voluntary termination.....                                               | 36 |
| 109 | 3.14.3 | Discontinuation and data collection .....                                | 36 |
| 110 | 3.15   | Duration .....                                                           | 37 |
| 111 | 4      | Safety Monitoring & Reporting Protocols.....                             | 37 |
| 112 | 4.1.1  | Definition of adverse events .....                                       | 37 |
| 113 | 4.1.2  | Definition of Serious Adverse Event .....                                | 38 |
| 114 | 4.1.3  | Definition of Suspected Unexpected Serious Adverse Reaction .....        | 38 |
| 115 | 4.1.4  | Assessment of adverse event severity and relationship to treatment ..... | 38 |
| 116 | 4.1.5  | Recording of SAEs, and SUSARs .....                                      | 39 |
| 117 | 4.1.6  | Reporting of SAEs and SUSARs.....                                        | 41 |
| 118 | 5      | PROTOCOL DEVIATIONS.....                                                 | 41 |
| 119 | 6      | STATISTICAL ANALYSES .....                                               | 41 |
| 120 | 6.1    | Sample size determination .....                                          | 41 |
| 121 | 6.2    | Statistical methods.....                                                 | 42 |
| 122 | 7      | DATA MANAGEMENT.....                                                     | 42 |
| 123 | 7.1    | Data identification.....                                                 | 42 |
| 124 | 7.2    | CRFs and direct access to source data and documents .....                | 42 |
| 125 | 7.3    | Databases, data entry and data management procedures .....               | 42 |
| 126 | 7.4    | Data Monitoring.....                                                     | 43 |
| 127 | 8      | QUALITY CONTROL AND QUALITY ASSURANCE .....                              | 43 |
| 128 | 8.1    | Project Management Team .....                                            | 43 |
| 129 | 8.2    | Data Safety and Monitoring Board .....                                   | 43 |
| 130 | 8.3    | Compliance with trial protocol .....                                     | 44 |
| 131 | 9      | ETHICAL CONSIDERATIONS .....                                             | 44 |
| 132 | 10     | FINANCING AND INSURANCE.....                                             | 45 |
| 133 | 11     | PUBLICATION POLICY .....                                                 | 45 |
| 134 | 12     | REFERENCES .....                                                         | 45 |
| 135 |        |                                                                          |    |
| 136 |        |                                                                          |    |

137 **ABBREVIATIONS**

138

|     |         |                                                       |
|-----|---------|-------------------------------------------------------|
| 139 | ADIS    | Alcohol and Drug Information Service                  |
| 140 | AIS     | Athens Insomnia Scale                                 |
| 141 | ANOVA   | Analysis of Variance                                  |
| 142 | AUDIT   | Alcohol Use Disorders Identification Test             |
| 143 | b.d.    | Twice a day                                           |
| 144 | BDI-II  | Beck Depression Inventory II                          |
| 145 | CI      | Chief Investigator                                    |
| 146 | CONSORT | Consolidated Standards of Reporting Trials            |
| 147 | CPQ     | Cannabis Problems Questionnaire                       |
| 148 | CRF     | Case Report Form                                      |
| 149 | CWS     | Cannabis Withdrawal Scale                             |
| 150 | DSM     | Diagnostic and Statistical Manual of Mental Disorders |
| 151 | ECG     | Electrocardiogram                                     |
| 152 | FTND    | Fagerstrom Test for Nicotine Dependence               |
| 153 | GC/MS   | Gas Chromatography/Mass Spectrometry                  |
| 154 | GCP     | Good Clinical Practice                                |
| 155 | GP      | General Practitioner                                  |
| 156 | HAD     | Hospital Anxiety and Depression Scale                 |
| 157 | HREC    | Human Research Ethics Committee                       |
| 158 | MANOVA  | Multivariate Analysis of Variance                     |
| 159 | MO      | Medical Officer                                       |
| 160 | NCPIC   | National Cannabis Prevention and Information Centre   |
| 161 | NHMRC   | National Health and Medical Research Council          |
| 162 | NRT     | Nicotine Replacement Therapy                          |
| 163 | NSW     | New South Wales                                       |
| 164 | PAG     | Project Advisory Group                                |
| 165 | PMT     | Project Management Team                               |
| 166 | q.i.d.  | Four times a day                                      |
| 167 | RA      | Research Assistant                                    |
| 168 | SAE     | Serious Adverse Event                                 |
| 169 | SDS     | Severity of Dependence Scale                          |
| 170 | SF-12   | Short Form 12                                         |
| 171 | SESLHN  | South East Sydney Local Health Network                |
| 172 | HNELHN  | Hunter New England Local Health Network               |
| 173 | SUSAR   | Suspected Unexpected Serious Adverse Reaction         |
| 174 | TGA     | Therapeutic Goods Administration                      |
| 175 | TLFB    | Timeline Followback Method                            |
| 176 | UDS     | Urine Drug Screen                                     |
| 177 | WSLLHD  | Western Sydney Local Health District                  |

178

## 1 GENERAL INFORMATION

### 1.1 SYNOPSIS

**Study title:** An RCT of cannabinoid replacement therapy (sativex®) for the management of treatment-resistant cannabis dependent patients

**Protocol number:** 1.0

**Development phase:** Phase III

**Indication:** Cannabis dependence

**Investigational drug:** Sativex (1 spray: 2.7 mg THC and 2.5 mg CBD)

**Dosage form/strength:** Maximum dose of individually titrated doses, up to 8 sprays (21.6 mg THC:20 mg CBD) delivered as buccal spray up to four times a day.

**Number of participants:** 142

**Number of centres:** 4

**Study duration:** 36 months

**Duration of subject participation:** 24 weeks, comprising of 12 weeks of study intervention with medication at maintenance doses, 1 week of medication taper (week 13), and then follow up at week 24 for research interview. All participants will be followed for research, irrespective of completion of the trial intervention.

**Objectives of the study:** The study objective is to examine the efficacy, safety and cost-effectiveness of Sativex for treating cannabis dependent patients in the community who have not previously responded to conventional treatment approaches. Specific hypotheses are that:

1. Sativex treatment will result in significantly improved cannabis treatment outcomes (reduced illicit cannabis use and greater treatment retention) compared to placebo.
2. Sativex will have an acceptable adverse event and abuse liability profile in a cannabis-dependent population.
3. Sativex treatment will be cost effective compared to placebo.
4. Sativex treatment will result in significant improvements in a range of physical and mental health, cognitive performance, and psychosocial function measures compared to placebo.

**Study design:** This project is a phase III multisite (four-sites) outpatient randomised double-blind placebo controlled parallel design comparing a 12-week course of buccal (mouth spray) administered Sativex (Experimental) to placebo (Control) (Figure 1). Both groups will receive structured “best practice” psychosocial counselling, regular case management and clinical reviews over the course of the trial. The medication will be dispensed twice weekly and UDS taken at medication dispense. Medication will be discontinued in week 13, with tapering doses. Participants will be followed up at week 24, 12 weeks after maintenance Sativex/placebo treatment.

**Setting.** The trial will be coordinated from the University of Sydney. Treatment will be provided at The Langton Centre, South East Sydney Local Health District (SESLHD); The Cannabis Clinic at St George Hospital (SESLHD); Centre for Addiction Medicine, Cumberland Hospital and the Hunter New England Clinical Drug and Alcohol Services Site (Newcastle Cannabis Clinic); services experienced in delivering and evaluating interventions for cannabis users and in pharmacotherapy research. Analytical toxicology services will be provided by the laboratory of CID

#### Eligibility criteria:

**Inclusion criteria:** (a) *aged 18 to 65 years*, (b) *meet ICD-10 cannabis dependence criteria*; (c) *have previously attempted but not responded to treatment for cannabis use* (operationalized as relapsed to regular cannabis use within 1 month of attempted cessation, with or without outside intervention); and (d) *willing and able to provide informed consent* to study procedures (including not driving or operating machinery whilst engaging in this study).

**Exclusion criteria:** (a) *Presence of another substance use disorder* (alcohol, other illicit or prescription drug dependence), diagnosed by specialist clinical assessment, including urine drug screen (UDS); (b) *severe medical* (e.g. chronic pain, hepatic or cardiovascular disease) *or psychiatric disorder* (e.g. schizophrenia, recent drug-induced psychosis, severe affective disorder), assessed by the study medical officer; (c) *pregnant or lactating women* (urine  $\beta$ -hCG); (d) *concerns regarding safe storage of medication* (e.g. unsuitable home environment or significant child protection concerns); (e) *not available for follow-up* (e.g. likely travel or imprisonment), (f) Court mandated to attend cannabis treatment. (g) History of epilepsy or recurrent seizures (h) Renal impairment, (i) Current active treatment for cannabis use disorder

These criteria aim to exclude individuals with concurrent conditions that jeopardise safety or confound data interpretation.

**Statistical methods:** Chi square and ANOVA will identify any baseline covariates that differ between groups for controlling the main analyses. Missing data will be imputed using multiple imputation except for missing urine where cannabis use will be assumed to have taken place. All analyses will use Intention-to-treat. Mixed Models for Repeated Measures (MMRM) will compare groups on changes in outcome variables (cannabis use and secondary outcomes) in the medication phase. Adverse Events will be analysed using chi-square. A Cox proportional hazards model will compare retention in treatment between study arms, controlling for potential confounds. The impact of the intervention on post-medication outcomes will compare changes in cannabis use outcomes at baseline and at follow up between groups using MMRMs. Family-wise error corrections will control for Type 1 errors where multiple comparisons are performed.

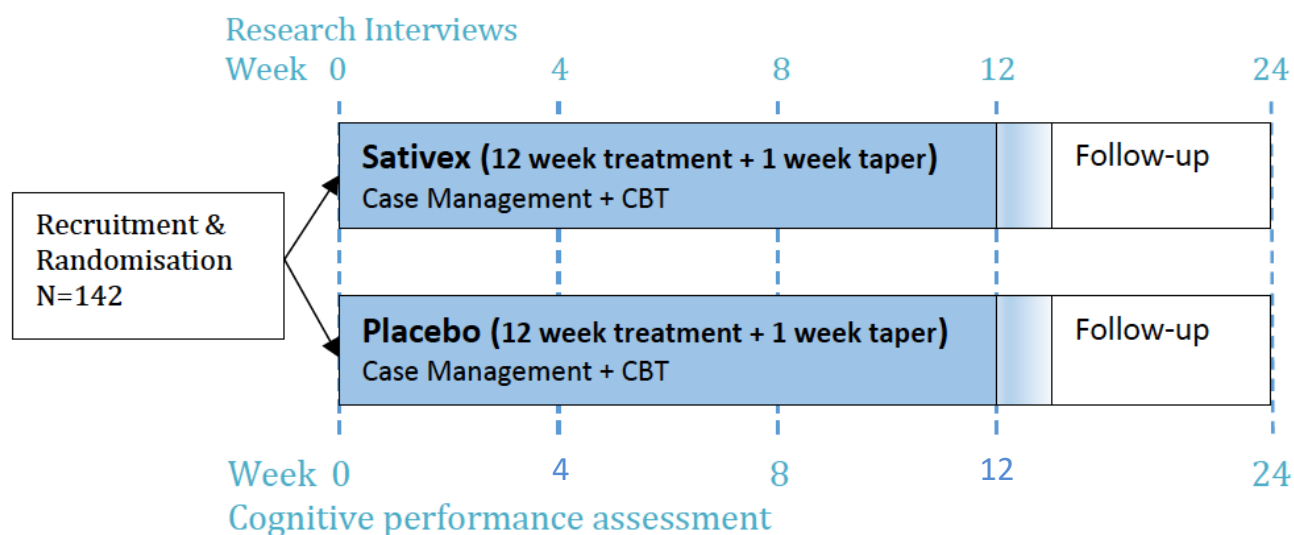

Figure 1. Schematic overview of study design

## 1.2 Investigators

### 1.2.1 Chief Investigators (CIs)

#### Chief Investigator A (CIA)

Professor Nicholas Lintzeris

Position: Director, Drug & Alcohol Services, South East Sydney Local Health District, & Faculty of Medicine, University of Sydney

✉: c/o The Langton Centre, 591 South Dowling Street, Surry Hills, NSW 2010

☎: (02) 9332 8702      0419261675 (mob)

📧: (02) 9332 8700      📧: [nicholas.lintzeris@sesiahs.health.nsw.gov.au](mailto:nicholas.lintzeris@sesiahs.health.nsw.gov.au)

#### Chief Investigator B (CIB)

Associate Professor David Allsop

✉: Psychopharmacology Laboratory, School of Psychology, The University of Sydney, Room 242 Top South Badham, Sydney, NSW, 2006, Australia

☎: +61 2 9351 3372      Mobile: +61 (0) 405189190

📧: +61 2 9036 5223      📧: [david.allsop@sydney.edu.au](mailto:david.allsop@sydney.edu.au)

#### Chief Investigator C (CIC)

Professor Jan Copeland

Position: Director, National Cannabis Prevention and Information Centre, UNSW 2052

✉: PO Box 684, Randwick, NSW 2031

☎: (02) 9385 0208      📧: (02) 9385 0201      📧: [j.copeland@unsw.edu.au](mailto:j.copeland@unsw.edu.au)

#### Chief Investigator D (CID)

Professor Iain McGregor

267 Position: Professor, School of Psychology, University of Sydney  
268 ✉: School of Psychology, Building A18, University of Sydney, 2006  
269 ☎: (02) 9351 3571 ☎: (02) 9351 2603 📧: [iain@psych.usyd.edu.au](mailto:iain@psych.usyd.edu.au)

270

#### 271 Chief Investigator E (CIE)

272 Associate Professor Adrian Dunlop  
273 Position: Area Director, Senior Staff Specialist, Drug and Alcohol Clinical Services, Hunter New England Local Health  
274 Network, Belmont Hospital  
275 ✉: Newcastle Community Health Centre, 670 Hunter Street, Newcastle, NSW 2300  
276 ☎: (02) 401 64664 0423568178 (mob)  
277 📧: (02) 401 64661 📧: [Adrian.Dunlop@hnehealth.nsw.gov.au](mailto:Adrian.Dunlop@hnehealth.nsw.gov.au)

278

#### 279 Chief Investigator F (CIF)

280 Dr Marian Shanahan Position: Senior Research Fellow  
281 ✉: Drug Policy Modelling Program, National Drug and Alcohol Research Centre, University of New South Wales,  
282 Sydney, 2031  
283 ☎: +61 (2) 89361215 0415504064 (mob)  
284 📧: [m.shanahan@unsw.edu.au](mailto:m.shanahan@unsw.edu.au)

285

#### 286 Chief Investigator G (CIG)

287 Associate Professor Raimondo Bruno  
288 ✉: School of Psychology, University of Tasmania, Private Bag 30, Hobart, Tasmania, 7001  
289 ☎: +61 (3) 62262240 ☎: (03)62262883 (mob)  
290 📧: [Raimondo.Bruno@utas.edu.au](mailto:Raimondo.Bruno@utas.edu.au)

291

292

### 1.2.2 Associate Investigators (CIs)

293 Dr Mark Montebello  
294 Position: Lecturer (Conjoint), School of Psychiatry, University of New South Wales & Senior Staff Specialist in  
295 Psychiatry at The Langton Centre  
296 📧: [Mark.Montebello@sesiahs.health.nsw.gov.au](mailto:Mark.Montebello@sesiahs.health.nsw.gov.au)

297

298 Dr Craig Sadler  
299 Position: Staff Specialist Addiction Medicine, Director ADU, Calvary Mater Hospital, Director Withdrawal Services,  
300 Drug and Alcohol Clinical Services HNEAH, Conjoint Senior Lecturer University of Newcastle  
301 📧: [Craig.Sadler@hnehealth.nsw.gov.au](mailto:Craig.Sadler@hnehealth.nsw.gov.au)  
302 ☎: +61 438 719 776

303

304 Dr Nghi Phung (Site Investigator at Western Sydney Site)  
305 Position: Clinical Director/Staff Specialist, Centre for Addiction Medicine Building 83, Cumberland Hospital, 5 Fleet St,  
306 North Paramatta NSW 2151, Western Sydney Local Health District – Drug Health, Western Sydney Local Health  
307 District – Drug Health  
308 📧: [phungtnghi@gmail.com](mailto:phungtnghi@gmail.com)  
309 ☎: (02) 8860 3365  
310 Mobile: 0414 674 864

311

312

313

### 1.3 Study physicians

- 314 • Associate Professor Nicholas Lintzeris –Study Physician overseeing SESLHD sites
- 315 • Dr Mark Montebello - Study Physician at SESLHD Sites
- 316 • Associate Professor Adrian Dunlop - Study Physician overseeing Hunter New England Clinical Drug and Alcohol  
317 Services Site
- 318 • Dr Craig Sadler - Study Physician at Hunter New England Clinical Drug and Alcohol Services Site

- Dr Nghi Phung – Study Physician overseeing Centre for Addiction Medicine site at Westmead.

#### 1.4 Other personnel

Dr Mahsa Shahidi

Position: Research Officer, Centre for Addiction Medicine Building 83, Cumberland Hospital, 5 Fleet St, North  
Paramatta NSW 2151, Western Sydney Local Health District – Drug Health, Western Sydney Local Health District –  
Drug Health

✉: mahsa.shahidi@health.nsw.gov.au

☎: (02) 8860 4393

Mobile: 0413 105 413

Ms Mary Luksza

Position: Research Coordinator, Centre for Addiction Medicine Building 83, Cumberland Hospital, 5 Fleet St, North  
Paramatta NSW 2151, Western Sydney Local Health District – Drug Health

✉: mary.luksza@health.nsw.gov.au

☎: (02) 8860 4357

Mobile: 0413 516 516

Dr Amanda L. Brown

Position: Research Coordinator, Drug and Alcohol Clinical Services, Newcastle Community Health Centre, Level 3, 670  
Hunter St, Newcastle, NSW 2300

✉: Amanda.Brown@hnehealth.nsw.gov.au

☎: (02) 4016 4658

Mobile:

Mr Rohan Holland

Position: Research Officer, Drug and Alcohol Clinical Services, Newcastle Community Health Centre, Level 3, 670  
Hunter St, Newcastle, NSW 2300

✉: Rohan.Holland@hnehealth.nsw.gov.au

☎: (02) 4016 4664

Mobile:

**Research Nurse.** One at each trial site. Reports to Site Investigators (CIA, CIF & AIs).

[Name] Consuelo Rivas

Position: Senior Nurse, D&A Services, SESLHD for Langton Centre and St. George Cannabis Clinics

✉:

☎:

[Name] TBA

Position: Senior Nurse, Hunter New England Drug and Alcohol Clinical Services

✉:

☎:

[Name] TBA

Position: Senior Nurse, Centre for Addiction Medicine, Westmead

✉:

☎:



373  
374  
375  
376  
377  
378  
379  
380  
381  
382  
383  
384  
385  
386  
387  
388  
389  
390  
391  
392  
393  
394  
395  
396  
397  
398  
399  
400  
401  
402  
403  
404  
405  
406  
407  
408  
409  
410  
411  
412  
413  
414  
415  
416  
417  
418  
419  
420  
421  
422

## Data Safety and Monitoring Board (DSMB)

Dr Deborah Zador, MD, Senior Addiction Specialist, Fellow of the Chapter of Addiction Medicine  
Position: Deputy Clinical Director and Senior Staff Specialist, D&A Services, Justice Health & Forensic Mental Health Network

☎: 02 9811 0117

✉: [deborahzador@hotmail.com](mailto:deborahzador@hotmail.com) mobile: 0417 994 971

Dr Nadia Solowij

Position: Associate Professor, Cannabis & other drug neuropsychology, School of Psychology, University of Wollongong.

☎: (02) 4221 3732

✉: [nadia@uow.edu.au](mailto:nadia@uow.edu.au) Mobile: 0431 910 340

Dr Jason Ferris, PhD, MBIostatistics

Position: Biostatistics. Senior Research Fellow, NHMRC Postdoctoral Fellow Institute for Social Science Research, The University of Queensland

☎: +61 7 3365 6070

✉: [j.ferris@uq.edu.au](mailto:j.ferris@uq.edu.au)

## Head of Cognitive Testing

### Chief Investigator G (CIG)

Associate Professor Raimondo Bruno

✉: School of Psychology, University of Tasmania, Private Bag 30, Hobart, Tasmania, 7001

☎: +61 (3) 62262240 ☎: (03)62262883 (mob)

✉: [Raimondo.Bruno@utas.edu.au](mailto:Raimondo.Bruno@utas.edu.au)

## 1.5 Persons authorised to sign protocol and protocol amendments

The University of Sydney is the sponsor of the trial, and Professor Nicholas Lintzeris (CIA) is the scientific delegate of the sponsor and is responsible for the overall conduct of the trial and is authorised to sign the protocol and its amendments. The Principal Investigators (Medical) at each site ( Prof. Nick Lintzeris and Ass. Prof. Adrian Dunlop; Dr Nghi Phung) are responsible for the appropriate conduct of the trial at each site, in line with the Clinical Protocol, and so are authorised to sign the protocol and its amendments. A/Prof David Allsop is the Trial Coordinator and responsible for compiling the clinical protocol and obtaining the above senior management teams signed acknowledgement that they are fully aware of and endorse all aspects of the study contained within the protocol.

## 1.6 Trial site

### 1.6.1 Clinical

Hunter New England Drug and Alcohol Clinical Services (Cannabis Clinic), NSW

✉: Newcastle Community Health Services, 670 Hunter Street, Newcastle West, NSW 2302

✉: [ncc@hnehealth.nsw.gov.au](mailto:ncc@hnehealth.nsw.gov.au)

☎: (02) 4923 6760 ☎: 4961 2456

South East Sydney Local Health District Cannabis Clinic Sites, including:

(1) The Langton Centre

✉: 591 South Dowling Street, Surry Hills, Sydney, NSW 2010

☎: +61 2 9332 8777 ☎: +61 2 9332 8700

423  
424  
425  
426  
427

(2) St George & Sutherland Hospital  
✉: Level 1, No. 2 South Street, Kogarah, 2217  
☎: (02) 91132944  
☎: (02) 9113 3977

428  
429  
430  
431

Centre for Addiction Medicine, Westmead  
☎: (02) 88602565

432  
433

The study will be conducted at these specialist outpatient drug treatment units, staffed by medical, nursing and allied health staff, with on-call medical services after-hours.

434  
435  
436  
437  
438  
439

### 1.6.2 Laboratory

Psychopharmacology Laboratory  
✉: Room 224 Top South Badham Building, School of Psychology  
University of Sydney, NSW 2006  
☎: (02) 9351 3571 ☎: (02) 9351 8023

440  
441  
442  
443

Newcastle Pathology Department  
✉: (TBA)  
☎: ☎:

444

## 1.7 Pharmacy

445  
446  
447  
448  
449  
450

*Trial Pharmacist – Langton Centre*  
Therese Chan  
Chief pharmacist at Langton Centre/St George  
✉: 591 South Dowling Street, Surry Hills, Sydney, NSW 2010  
✉: [therese.chan@sesiahs.health.nsw.gov.au](mailto:therese.chan@sesiahs.health.nsw.gov.au)  
☎: 0411 280 100

451  
452  
453  
454

*Trial Pharmacist – St George Cannabis Clinic*  
As for Langton Centre

455  
456  
457  
458  
459

*Trial Pharmacist – Hunter New England Clinical Drug and Alcohol Services Site (Cannabis Clinic)*  
Anthony Winmill - HNE D&A pharmacist – Drug and Alcohol Clinical Services, Newcastle Community Health Centre  
✉: 670 Hunter Street, Newcastle 2300  
✉: [Anthony.Winmill@hnehealth.nsw.gov.au](mailto:Anthony.Winmill@hnehealth.nsw.gov.au)

460  
461  
462  
463  
464

*Trial Pharmacist – Centre for Addiction Medicine, Westmead*  
Con Spiliopoulos  
✉: Centre for Addiction Medicine, Building 83, Cumberland Hospital, 5 Fleet St, North Parramatta NSW 2151  
☎: (02) 8860 2566  
✉: [Con.Spiliopoulos@health.nsw.gov.au](mailto:Con.Spiliopoulos@health.nsw.gov.au)

465

## 1.8 Blood and Urine Sampling and Storage Services

466  
467  
468  
469

**Newcastle:**  
Narelle Eddington, Hunter Area Pathology Service (HAPS), Clinical Trials Contact  
☎: (02) 4921 4991 0423 298 250 (mob)  
✉: [Narelle.Eddington@hnehealth.nsw.gov.au](mailto:Narelle.Eddington@hnehealth.nsw.gov.au)

470  
471  
472

Other sites will perform local in house blood and urine treatment and storage.

473 **2 BACKGROUND INFORMATION**474 **2.1 Treating cannabis dependence**

475 Approximately 180 million people currently use cannabis worldwide, dwarfing the use of all  
 476 other illicit substances.<sup>1</sup> Up to a third of the adult population in Australia have used cannabis at some  
 477 stage in their lives,<sup>2</sup> approximately 10% of whom become dependent.<sup>3</sup> Cannabis dependence is  
 478 associated with a range of health problems (cognitive, psychiatric, cardiovascular and respiratory  
 479 disorders),<sup>4</sup> and considerable societal burden.<sup>5</sup> A recent estimate (by CIF) of the economic burden of  
 480 cannabis use in NSW alone identified an annual cost to the criminal justice system of \$61 million, to  
 481 the health care sector of \$14 million, and motor vehicle accident related costs of \$2.3 million.<sup>6</sup>  
 482 Cannabis ranks second of all illicit drugs in hospital associated costs,<sup>7</sup> and is the primary drug of  
 483 concern in 22% of Australian Drug and Alcohol (D&A) treatment episodes,<sup>2</sup> and is identified as a  
 484 problem in 45% of all of such episodes.<sup>2</sup> As with other drugs of abuse, the majority of costs arise from  
 485 the small proportion of heavily dependent users who experience most harm.

486 The effectiveness of existing treatments is far from satisfactory. Reviews of current best practice  
 487 psychosocial interventions (e.g. cognitive behavioural therapy (CBT)) indicate that around 80% of  
 488 patients relapse within 1-6 months.<sup>9-11</sup> Treatment of acute cannabis withdrawal is associated with  
 489 similar relapse rates following withdrawal completion.<sup>8,12</sup> More effective approaches are clearly  
 490 required for the tens of thousands of Australians seeking help every year for cannabis-related  
 491 problems. As with the treatment of other chronic addiction and mental health conditions, the  
 492 importance of adjunctive or substitute medicines to support current best practice psychosocial  
 493 interventions has been identified.<sup>10</sup> However there are as yet no proven pharmacotherapies for  
 494 cannabis dependence and a very large unmet treatment demand.<sup>13</sup>

Our own recent work in this area (CIs A to E) involved an NHMRC-funded double blind placebo-controlled RCT recently published in JAMA Psychiatry.<sup>8</sup> This demonstrated that Sativex suppressed cannabis withdrawal and cravings in treatment-seekers during inpatient detoxification (Fig. 1A), and retained patients in treatment longer than placebo (Fig. 1B).<sup>8</sup> Sativex was administered in doses of up to 32 sprays a day (8 sprays, 6 hourly) on days 1 to 3, and tapered off from days 4 to 6. Although Sativex ameliorated withdrawal symptoms, there were high rates of relapse following discharge (69% at one month) with and relapse rates were similar between the two groups. Thus the benefits of the 6 day Sativex regimen did not persist. This is not entirely surprising: there is little evidence for any medication-assisted withdrawal promoting long-term abstinence without ongoing support.

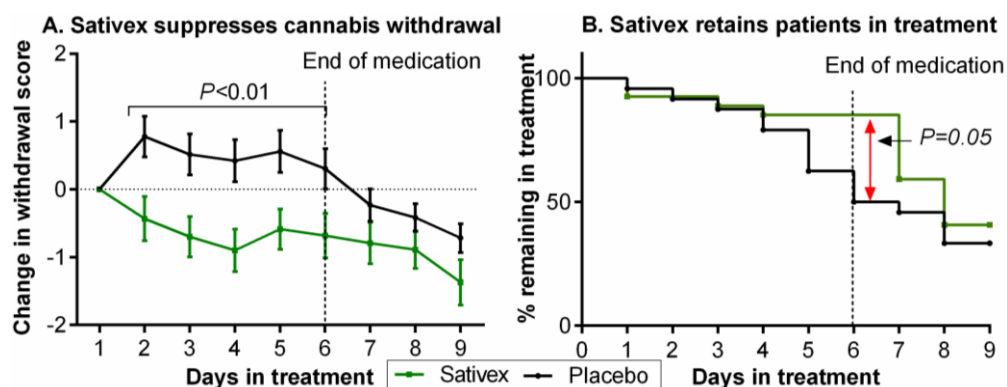

Figure 2. Data from our inpatient trial: (A) Sativex suppresses cannabis withdrawal during inpatient detoxification, and (B) retains patients in treatment longer.

495 Medication trials for cannabis dependence are an emerging area of research.<sup>14</sup> The majority of  
 496 trials have either been laboratory based or have focussed only on treating withdrawal symptoms  
 497 during initial abstinence rather than longer term relapse prevention. Medicines tested for withdrawal

498 relief include the antidepressants bupropion and nefazodone,<sup>15</sup> the mood stabilizers divalproex<sup>16</sup> and  
499 lithium (CIs A-D),<sup>12,17</sup> and the  $\alpha_2$ -adrenergic agonist lofexidine.<sup>18</sup> Despite sometimes compelling  
500 support from preclinical research, these human trials have only achieved limited outcomes. More  
501 promising results have emerged with the use of substitute cannabinoid receptor agonists.  
502 Dronabinol, a synthetic analogue of THC that is orally administered, dose-dependently reduced  
503 cannabis withdrawal in laboratory<sup>16</sup> and outpatient settings.<sup>26,27</sup> Nabilone, another synthetic THC  
504 analogue was efficacious in the laboratory, but is as yet untested in the clinic.<sup>19</sup>  
505

## 506 **2.2 The case for agonist treatment for cannabis dependence**

507 The high rate of relapse after acute medication-assisted withdrawal has led a number of leading  
508 experts to identify the need for longer-term outpatient trials of cannabinoid replacement  
509 therapies.<sup>10,13</sup> Agonist replacement therapies have unequivocal safety and efficacy in the treatment  
510 of nicotine<sup>20</sup> and opioid dependence.<sup>21</sup> The rationale for agonist medications in cannabis dependence  
511 is that they provide a safer route of administration (than smoking), should reduce unsanctioned drug  
512 use by preventing withdrawal and reducing cravings,<sup>8</sup> and attenuate the acute effects of smoked  
513 cannabis,<sup>11,28</sup> facilitating greater engagement in psychosocial interventions. Together, these  
514 anticipated effects should empower patients to make the necessary lifestyle changes, and distance  
515 themselves from regular substance use, prior to tapering off the agonist medication.

516 To date, there has been only one controlled clinical trial of agonist medication for treating  
517 cannabis dependence beyond the acute withdrawal period.<sup>22</sup> A 12-week outpatient trial of oral  
518 dronabinol (20 mg twice a day) did not significantly reduce cannabis use. However subsequent  
519 laboratory research has shown that higher single doses of dronabinol (60 or 120 mg) are required to  
520 significantly reduce cannabis withdrawal discomfort, suggesting inadequate dosing in the prior  
521 clinical RCT.<sup>23</sup> Furthermore, the pharmacokinetic profile of dronabinol indicates it may not be ideal  
522 for this purpose, with poor bioavailability, and a slow onset of action compared to smoked  
523 cannabis.<sup>24,25</sup> Nabilone, another oral synthetic THC analogue with better bioavailability than  
524 dronabinol, did reduce cannabis use in laboratory studies,<sup>19</sup> but has not been tested clinically.

## 525 **2.3 The rationale for sativex in treating cannabis dependence**

526 Sativex has been approved in Australia since Nov 2012 for *symptomatic relief of moderate to*  
527 *severe spasticity in multiple sclerosis (MS)* and in 8 other countries for similar indications. It is an  
528 oromucosal spray that is absorbed buccally and contains extracts from *Cannabis sativa* plants grown  
529 under licence in the UK by the company GW Pharmaceuticals. These extracts, known collectively as  
530 *nabiximols*, contain 27 mg/ml THC and 25 mg/ml CBD per spray, with small amounts (4 mg/ml) of  
531 other plant-derived cannabinoids. Sativex is delivered in a mechanically actuated pump, with each  
532 spray delivering 100 $\mu$ L (2.7 mg THC and 2.5 mg CBD). The buccal route provides a more rapid onset  
533 of action and more favourable pharmacokinetics than oral THC.<sup>26</sup>

534 THC is the primary psychoactive component of cannabis, and its intoxicating and rewarding  
535 effects are mediated by its partial agonist properties at cannabinoid type-1 (CB1) receptors.<sup>27</sup> The  
536 THC in Sativex provides the agonist substitution component without the spiking in THC than typically  
537 seen with smoked illicit cannabis use as a result of its buccal administration route taking more time  
538 for the cannabinoids to be absorbed into the blood stream and reach their site of action.<sup>28</sup>  
539 Nevertheless Sativex delivers cannabinoids sufficient levels to ameliorate withdrawal and cravings.  
540 The high CBD content of Sativex is a major innovation over existing CB1 receptor agonists such as  
541 Dronabinol and Nabilone. While structurally similar to THC, CBD has no intoxicating effects and  
542 recent research indicates that CBD has powerful anxiolytic, antidepressant and antipsychotic  
543 properties, and can attenuate paranoia and other adverse psychological effects of THC.<sup>29</sup>

544 Whilst the effects of CBD in cannabis on cognitive and memory impairment is less well  
545 researched, there is a growing body of interesting findings which suggest plausible research  
546 hypotheses in the current study. CBD may minimise the cognitive and memory deficits associated

547 with THC. High doses of THC are well known to cause memory impairment, mediated through  
 548 hippocampal and prefrontal CB1 receptors. CBD appears to directly counter these effects. For  
 549 example, hippocampal volume is inversely correlated with long-term THC levels in the hair of illicit  
 550 cannabis users but positively correlated with CBD levels.<sup>30</sup> Memory impairment occurs during acute  
 551 intoxication with illicit cannabis with low CBD content; however, no change from baseline  
 552 performance was apparent with high-CBD cannabis.<sup>31</sup> Hence, the high CBD levels in Sativex could  
 553 introduce positive therapeutic effects and counteract the anxiety, low mood and cognitive deficits  
 554 associated with heavy illicit cannabis use.<sup>8,32</sup> While CBD can occur naturally in cannabis plants, a  
 555 recent study by CID shows that Australian cannabis generally has high THC levels but very low and  
 556 often undetectable levels of CBD (Fig. 3A).<sup>33</sup> Our own recent analysis of treatment seeking cannabis  
 557 users shows high THC levels but virtually no CBD in their plasma,<sup>8,12</sup> (Fig 3B). Thus, the high  
 558 concentration of CBD in Sativex may therefore counter the anxiety, low mood, agitation, paranoia  
 559 and cognitive deficits associated with illicit cannabis use, and provide a potentially 'safer'  
 560 cannabinoid than either synthetic THC or illicit cannabis.<sup>34</sup>

561 In summary, the pharmacological profile of Sativex suggests it may have advantages over other  
 562 available THC agonist medications in treating cannabis dependence. Our priority is to build on our  
 563 expertise in this area and to examine whether the withdrawal benefits we observed in the inpatient  
 564 environment extend to longer-term relapse prevention in outpatient settings, where the vast  
 565 majority of treatment for cannabis dependence occurs. Of course treatment with Sativex must  
 566 carefully address the safety concerns inherent in the use of any agonist medication with psychoactive  
 567 effects.

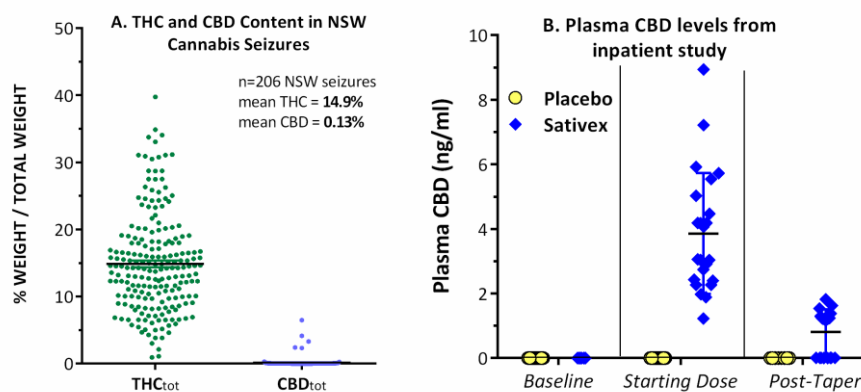

Figure 3. (A) Cannabis seized by NSW police has high THC and very low CBD content. (B) CBD was undetectable in plasma in dependent cannabis users (n=25 per condition) at entry into our inpatient study.

## 568 2.4 Safety and abuse liability of sativex

569 The potential benefits of Sativex must of course to be balanced against safety concerns  
 570 including: (a) adverse events (AEs): e.g. intoxication, cognitive impairment and psychiatric morbidity,  
 571 and (b) abuse liability in this patient population. A recent safety assessment conducted by the  
 572 Therapeutic Goods Administration (TGA) summarised available safety data from all suitable Sativex  
 573 Phase III trials (n=1821 subjects), and available post-marketing surveillance systems (estimated at  
 574 5,500 patient exposure years, often in combination with other medications such as antidepressants,  
 575 opioids, benzodiazepines). Their conclusion was: *On balance, Sativex is associated with a wide range*  
 576 *of undesirable CNS side effects, including dizziness, fatigue and disorientation .... The AE profile is*  
 577 *broadly consistent with expectations, given the pharmacological profile of cannabis..... The issues*  
 578 *primarily relate to tolerability rather than safety. None of the AEs raise major safety concerns”*,<sup>35; p.118</sup>  
 579 consistent with other reviews of Sativex safety.<sup>36</sup>

580 Another concern is the possible development of cannabis-related psychiatric morbidity in  
 581 Sativex-treated patients. However, as highlighted in the TGA review: *The background of illicit*  
 582 *(cannabis) use raises some significant concerns about the psychiatric morbidity of cannabis –*  
 583 *although it should be acknowledged that recreational use involves higher doses and more rapid*

584 *absorption than seen with Sativex and therefore would be expected to produce more substantial side*  
 585 *effects.*<sup>35; p.111</sup> Indeed those who discontinue illicit cannabis use with Sativex treatment may  
 586 experience a reduction of cannabis-related adverse events.

587 Safety concerns also include the potential for medication abuse or diversion, particularly given  
 588 the target population. Only one study has examined abuse potential of Sativex in a laboratory setting  
 589 in which 23 recreational cannabis users were administered single doses of Sativex (4, 8 and 16  
 590 sprays), dronabinol (20 and 40 mg) and placebo.<sup>37</sup> Sativex did not produce significant adverse  
 591 cognitive or psychomotor effects. While Sativex showed similar or lower abuse potential than  
 592 dronabinol, both medications at higher doses had significant abuse potential compared with placebo,  
 593 highlighting the need for careful monitoring of abuse and aberrant medication-related behaviours  
 594 during future research.

595

## 596 2.5 Potential risks and benefits to human subjects

597 Participation in the trial is associated with potential risks and benefits. Potential benefits include  
 598 improvement in the clinical condition and circumstances for individuals, commensurate with their  
 599 treatment goals. Both groups will receive ‘best practice’ ancillary clinical services, including regular  
 600 counselling, case management and clinical reviews from multidisciplinary teams experienced in  
 601 treating clients with cannabis dependence. Sativex may or may not confer benefit over placebo.  
 602 Sativex however may be associated with a number of potential risks or adverse reactions, including  
 603 drug-drug interactions.

604

605 The key safety concern from Sativex phase III trials to date, and identified by the TGA in their  
 606 recent review, is the ability to tolerate the cannabis-like effects of Sativex. This summary statement  
 607 on Sativex was based on research using non cannabis using populations, primarily those suffering  
 608 from MS. “Cannabis like effects” are obviously less of a concern in our target population (treatment  
 609 resistant, dependent cannabis users), who will, by definition, have established tolerance to the AE  
 610 profile of cannabinoids. Indeed, our recent inpatient study demonstrated Sativex was well tolerated  
 611 with no difference in AEs compared to placebo.<sup>8</sup> Formal cognitive assessment indicated only modest  
 612 reductions in cognitive performance speed with Sativex and no impairment in accuracy, or practical  
 613 impairment. Clearly cognitive impairment is not a barrier to further outpatient trials.<sup>38</sup> In addition,  
 614 subjective and objective ratings of intoxication obtained before and after each dose of Sativex in our  
 615 inpatient study showed no significant difference between Sativex at high doses and placebo (Fig 4).

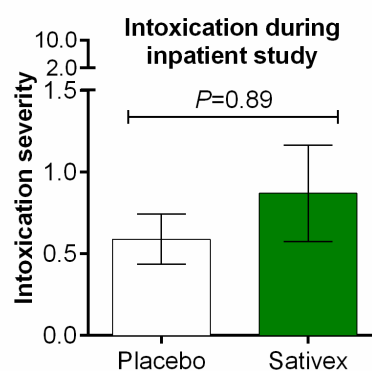

627 **Figure 4. Sativex is not significantly**  
 628 **more intoxicating than placebo**  
 629

Our previous research in an inpatient setting demonstrated tolerable adverse events compared to placebo in a similar clinical population using comparable doses to those proposed here. However, the outpatient nature of this study raises the potential that some participants may also use other substances (alcohol, illicit or pharmaceutical drugs), with the potential for adverse drug-drug interactions, most notably additive intoxication (sedation, impaired cognition and motor performance) with other sedative drugs (e.g. alcohol, benzodiazepines, opioids, tricyclic antidepressants). Participants will be informed and warned of these risks, and regularly monitored clinically throughout the medication phase of the study.

630 The frequency/incidence of reported adverse reactions to cannabis therapeutics may be influenced  
 631 by factors such as drug dose, concomitant drug use and disease, the administration setting, the  
 632 physician’s judgement and detection techniques, the patient’s subjective opinion, and the ongoing  
 633 use or overall tolerance to the drug. The most common reported adverse-effects to Sativex are

634 dizziness, disturbance in attention, dry mouth, tachycardia, and gastro-intestinal symptoms. Short-  
635 term memory and attention, motor skills, reaction time and skilled activities may be altered under  
636 the influence of this substance. Users may experience feelings of anxiety, dysphoria, paranoia and  
637 distortion of time and space. In the elderly, postural-hypotensive effects are of significance. Because  
638 of the rate of elimination of cannabinoids adverse effects may persist for more than 24 hours after a  
639 single dose; use within a therapeutic dosing regimen can lead to compounding of these adverse  
640 effects.

641  
642 Administration site irritation or oro-mucosal ulceration is very common during both the short-term  
643 and long-term use of Sativex<sup>®</sup>. Regular inspection of the oral mucosa, by the prescribing physician, is  
644 advised. Patients should be advised not to continue spraying on to sore or inflamed mucosa. The  
645 potential for impaired psychomotor performance makes it inadvisable for anyone under the  
646 influence of Sativex or other cannabinoids to operate machinery drive or engage in hazardous  
647 activity.

648  
649 The safety of Sativex may also be impacted by a number of metabolic states and drug-drug  
650 interactions. Sativex<sup>®</sup> is contraindicated in patients with current or previous psychiatric disorders  
651 (including manic depressive illness, depression, and schizophrenia), as the symptoms of these disease  
652 states may be unmasked or exacerbated by the use of cannabinoids. Sativex<sup>®</sup> should be used with  
653 caution in individuals receiving concomitant therapy with sedatives, hypnotics, or other psychoactive  
654 drugs because of the potential for additive or synergistic central nervous system (CNS) effects.  
655 Caution should be applied in the dosing of patients with hepatic and renal impairment, and/or  
656 concomitant use of drugs that induce/enhance or attenuate hepatic enzymes or alter renal  
657 clearance. Corresponding high blood levels of THC can increase the patient's risk of experiencing  
658 adverse effects. In elderly patients, the total body water decreases with a corresponding increase in  
659 total body fat. Consequently, the distribution and concentration of fat soluble cannabinoids are  
660 increased in these subjects.

661  
662 Cannabidiol (CBD) affects the metabolism of several drugs, including  $\Delta^9$ -THC, by selectively inhibiting  
663 or inactivating isozymes belonging to the cytochrome P450 enzyme families CYP2C, CYP3A and  
664 CYP2D, resulting in reduced metabolism and clearance of drugs metabolised by these enzymes and  
665 increasing plasma levels, including carbamazepine, phenytoin, oral contraceptives, methadone and  
666 cyclosporine. Cannabinoids are highly bound to plasma proteins and therefore might displace other  
667 protein-bound drugs. These properties have the potential to lead to drug-drug interactions and affect  
668 the pharmacokinetics of similar behaving co-administered drugs (e.g. warfarin).

669  
670 Individuals will be excluded from participating in the trial as considered clinically relevant during  
671 screening and assessment by the trial Addiction Medicine Specialists (see exclusion criteria Section  
672 1.1).

### 673 674 **Sativex treatment and driving**

675  
676 Whilst our previous work with Sativex suggests that there will be no driving related cognitive  
677 impairment produced by the allowable doses delivered in this study, participants will potentially risk  
678 legal ramifications if they are road side drug tested by police whilst they are on Sativex. The legal  
679 framework governing drug driving in Australia falls under the *Road Traffic Act 1974* which makes  
680 provision for two key drug driving offences: Driving with the presence of a prescribed illicit drug in  
681 oral fluid or blood; and Driving while impaired by a drug. As such we intend to exclude people who  
682 refuse to abstain from driving for the duration of their involvement with the medication arms of this  
683 project, and to have people sign a form stating that they voluntarily commit to abstain from driving  
684 during their engagement with the trial as it is potentially illegal to drive and they may be road side  
685 drug tested at any time under the *Road Traffic Act 1974*.

## 686 2.6 Trial conduct

687 This study will be conducted in compliance with:

- 688 • *World Medical Association, Declaration of Helsinki (2000)*
- 689 • *National Health and Medical Research Council's (NHMRC) National Statement on Ethical*
- 690 *Conduct in Human Research (2007)*
- 691 • *Australian Code for the Responsible Conduct of Research (2007)*
- 692 • The protocol approved by the Human Research Ethics Committee (HREC) of Hunter New
- 693 England Local Health District (HNELHD), and according to Good Clinical Practice (GCP)
- 694 standards.
- 695

## 696 3 TRIAL DESIGN

### 697 3.1 OBJECTIVES

#### 698 3.1.1 Primary objectives

699 The study objective is to examine the efficacy, safety and cost-effectiveness of Sativex for treating  
700 cannabis dependent patients in the community who have not previously responded to conventional  
701 treatment approaches. This study is not a detoxification study using primary endpoints of clinical  
702 outcomes after the discontinuation of medication, but rather its primary objective is to examine  
703 clinical outcomes during the 12-week maintenance phase of the medication. This trial plans to  
704 examine the impact of long-term maintenance Sativex treatment.

705 Specific objectives and hypotheses are:

- 706
- 707 1. **OBJECTIVE:** To examine the effects of Sativex vs. placebo on a range of cannabis treatment
- 708 efficacy outcomes, including changes in illicit cannabis use during treatment and effects on
- 709 retention in treatment.
- 710 **HYPOTHESIS:** *Sativex treatment will result in significantly improved cannabis treatment*
- 711 *outcomes (reduced illicit cannabis use and greater treatment retention) compared to placebo*
- 712
- 713 2. **OBJECTIVE:** To examine the adverse event profile, and the abuse liability, of Sativex as a take
- 714 home treatment for cannabis use disorder.
- 715 **HYPOTHESIS:** Sativex will have an acceptable adverse event and abuse liability profile in a
- 716 cannabis-dependent population.
- 717
- 718 3. **OBJECTIVE:** To assess the costs and health related quality of life (HRQoL) associated with the
- 719 provision of Sativex for treatment of resistant cannabis use disorder and the potential societal
- 720 savings (decreased health care, improved productivity, and decrease criminal behaviors) from
- 721 a potential successful treatment due to a decrease in other health care use, decreased
- 722 criminal behavior, and improved productivity)
- 723 **HYPOTHESIS:** Sativex treatment will be cost effective compared to placebo in achieving
- 724 improving **QALYs** and cannabis free days
- 725
- 726
- 727



728 **3.1.2 Secondary objectives**

729  
730 4. **OBJECTIVE:** To examine changes in health related outcomes during outpatient treatment with  
731 Sativex, including mental and physical health dimensions, cognitive performance, and  
732 psychosocial functioning.

733 **HYPOTHESIS:** Sativex treatment will result in significant improvements in a range of physical  
734 and mental health, cognitive performance, and psychosocial functioning measures compared  
735 to placebo.

736 **3.2 Design**

737 This project is a phase II multisite (four-sites) outpatient randomised double-blind placebo  
738 controlled parallel design comparing a 12-week course of buccal (mouth spray) administered Sativex  
739 (Experimental) to placebo (Control) (Figure 5). Both groups will receive structured “best practice”  
740 psychosocial counselling, regular case management and clinical reviews over the course of the trial.  
741 The medication will be discontinued in week 13 using tapering doses of trial medication. Participants  
742 will be followed up at week 24, 12 weeks after ‘maintenance’ Sativex/placebo treatment.

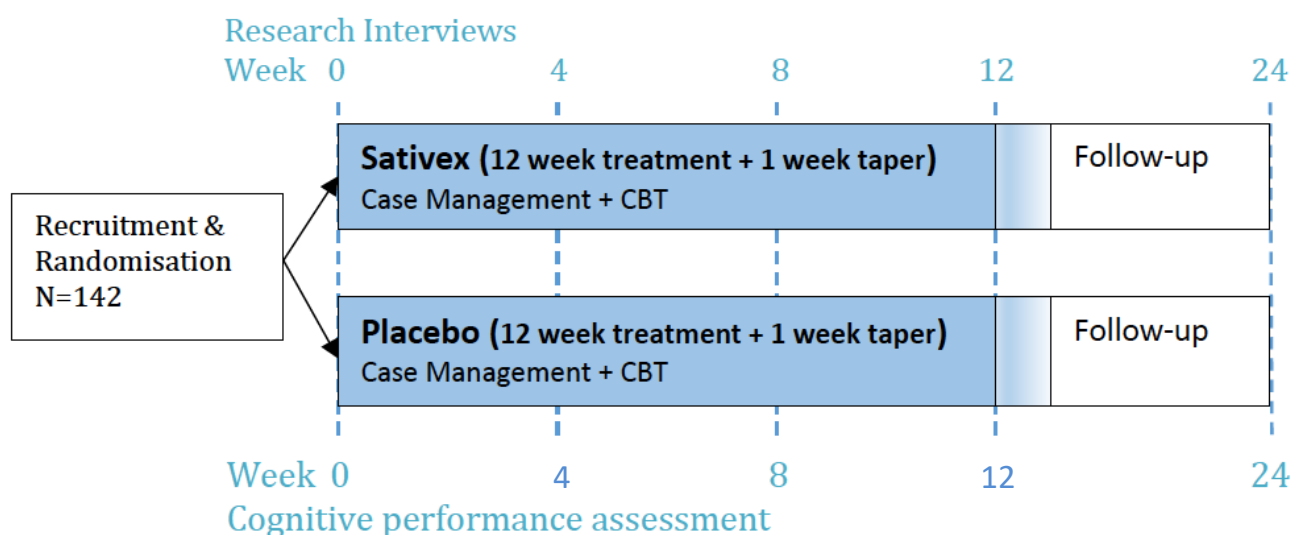

743  
744 **Figure 5. Schematic overview of study design**

745

746 **3.3 Study Outcome Measures**

747 **3.3.1 Research Interviews.**

748 Participants will undergo confidential interviews with a research officer at baseline (0), weeks 4,  
749 8, 12 (maintenance phase) and week 24 (follow-up). Information collected at the researcher  
750 interviews will remain confidential and not be made available to clinical staff. Subjects will be  
751 reimbursed \$40 for travel and related expenses to attend each of these research interviews.  
752 Participants will be followed-up for research interviews regardless of their continued participation in  
753 trial interventions. A range of strategies will be used to enhance research follow-up, described in  
754 Section 4.12.

755 **3.3.2 Outcome assessment**

756  
757 Outcome assessment at research interviews will be supported by twice weekly UDS during the  
758 medication phase (weeks 1-13) and data from clinical records. *The study is principally interested in*

759 *outcomes during the maintenance medication phase (Weeks 1-12)*. Data from 24-week follow-up  
760 interview will provide valuable information on outcomes after medication cessation, and will include  
761 UDS to compare illicit cannabis use between groups 12 weeks after Sativex/Placebo cessation. The  
762 outcomes described correspond to each of the primary and secondary objectives identified above.  
763  
764

### 765 **3.3.3 Primary outcomes**

#### 766 **3.3.3.1 Primary outcomes: Cannabis-related**

767  
768 (1) **Illicit cannabis use** will be quantified as 4-weekly point prevalence abstinence during the 12  
769 week maintenance phase by combining self-report data from researcher interviews (modified  
770 Timeline Followback<sup>39</sup> recording number of days and average daily amount (grams) of cannabis use),  
771 with objective measures of illicit cannabis use (weekly UDS with quantitative analysis of urinary THC,  
772 THC-COOH and CBD). Illicit cannabis use will also be reported as mean days used. More detail is  
773 provided regarding urine drug screen procedures in Section 3.9.  
774

775 (2) **Treatment retention** (days in protocol treatment) recorded from clinic records.  
776

#### 777 **3.3.3.2 Primary outcomes: Safety, aberrant medication use and abuse liability**

778  
779 (3) **Adverse events** will be assessed by self-report using a structured symptom checklist at 4-  
780 weekly research interviews, and by clinical assessment with the study medical officer at regular  
781 clinical reviews.  
782

783 (4) **Aberrant medication behaviours** (missed doses, extra doses, misuse or diversion) will be  
784 assessed by measuring amounts of medication used at clinical review (by weighing bottles) and  
785 by self-report at the researcher interviews using the modified ORBIT,<sup>40</sup> a validated aberrant  
786 medication behaviours self-report instrument. In addition, a series of subjective assessments of  
787 abuse liability (ratings of subjective liking, comparability to cannabis, strength of effect and  
788 subjective physiological effects) will be included in line with recent recommendations by the US  
789 FDA.<sup>41</sup>

#### 790 **3.3.3.3 Primary outcomes: Cost effectiveness**

791 (5) **Cost effectiveness** analysis will take a societal perspective. The primary outcome will be  
792 Quality Adjusted Life Years (QALY) measured by the SF-6D,<sup>42</sup> (4 weekly research interviews) and area  
793 under the curve calculated<sup>43</sup> for each individual. Costs will include all clinical resources provided as  
794 trial interventions, AE management, other health care (hospital, ED, GP visits, etc.) and crime, and  
795 costed using unit costs (CPI adjusted if necessary).<sup>44</sup> Lost productivity and personal costs will be  
796 collected by structured self-report (WHO Health and Performance Questionnaire: Clinical Trials  
797 Version).<sup>45</sup> The costs will be summed and combined with the outcome measure, and the incremental  
798 cost-effectiveness ratio [ICER = (C<sub>Sativex</sub>-C<sub>Control</sub>)/(E<sub>Sativex</sub>-E<sub>Control</sub>)] calculated. Boot strapping will be  
799 conducted to obtain reliable confidence intervals from skewed data, and cost effectiveness  
800 acceptability curves calculated. More detail is provided regarding health economics measures in  
801 section 3.11.  
802

### 803 3.3.4 Secondary outcomes

804 (6) **Other substance use** (alcohol, opioids, stimulants, benzodiazepines, cigarettes) will be  
805 recorded by self-report (number of days used past 4 weeks) by TLFB at 4-week research interviews  
806 and validated with UDS and/or breath testing collected to coincide with researcher interviews.

807  
808 (7) **Health outcomes and psychosocial function.** The SF-36<sup>46</sup> will be administered at 4-week  
809 research interviews to assess dimensions of physical and mental health and psychosocial function.  
810 Mental health will also be assessed using the Depression, Anxiety and Stress Scale (DASS-21),<sup>47</sup>  
811 Physical health outcomes will be also assessed using the Physical Health Questionnaire-15 (PHQ-15).  
812 Self-reported drug related crime (e.g. drug dealing, income generating crime) will be examined using  
813 the Crime Section of the Opiate Treatment Index.<sup>48</sup>

814  
815 (8) **Cognitive function** will be assessed by the researcher at baseline (week 0), during the  
816 maintenance phase (week 4 – with  $\pm$  1 week flexibility), and at follow-up (week 24) and is timed to  
817 coincide with research interviews. A targeted series of tests sensitive to acute THC effects (acute  
818 battery: Eriksen Flanker Task, Stop Signal Task, N-Back, Digit-Symbol Substitution, and Rapid Visual  
819 Information Processing) as well as a control measure (Wechsler Test of Adult Reading) and a measure  
820 of memory and learning (Ray Auditory Verbal Learning Test) will be conducted. At week 8  
821 assessments, cognitive testing (acute battery) will be performed 30 minutes prior to (trough) and 30  
822 minutes after (peak effects) supervised dosing. Blood samples will be taken for plasma cannabinoid  
823 levels (THC, CBD) to assist in the interpretation of findings. It will be of particular interest if Sativex  
824 use is associated with cognitive improvement relative to Placebo and relative to baseline. Week 24  
825 cognitive performance assessment will examine for within-subject longitudinal changes over time.  
826 More detail is provided regarding cognitive testing in Section 3.10.

827  
828 (9) **Details regarding participation in trial interventions** will be obtained from electronic and  
829 paper clinical records and include details regarding doses of trial medication used (daily ‘dosing diary’  
830 collected at each dispensing visit), participation in medical, counselling and clinical review sessions,  
831 and reasons for trial completion (as per protocol, treatment drop out, administrative or medical  
832 discharge). At the completion of the medication phase of the trial (week 12 researcher interview),  
833 participants will also be asked to rate their satisfaction with the trial medication, and for them to  
834 estimate which medication group they were assigned to (testing the blind) - described further in  
835 Section 3.12.

836

## 837 3.4 Study population

838

### 839 3.4.1 Inclusion and Exclusion criteria

840

#### 841 **Inclusion criteria:**

842

843 (a) aged 18 to 65 years,

844

845 (b) meet ICD-10 cannabis dependence criteria;

846

847 (c) Inability to stop cannabis use, as operationalised as relapse to cannabis use within one  
848 month of attempted cessation – either with or without outside intervention; and

849

850 (d) willing and able to provide informed consent to study procedures (including not driving or  
851 operating machinery if Sativex is affecting their ability to perform these tasks, consistent with the  
852 Product Label).

853 **Exclusion criteria:**

854  
855  
856  
857  
858  
859  
860  
861  
862  
863  
864  
865  
866  
867  
868  
869  
870  
871  
  
872  
873  
874  
875  
876  
877  
878  
879  
880  
881  
882  
883  
884  
885  
886  
887  
888  
889  
890  
891  
892  
893  
894  
895  
896  
897  
898  
899  
900

- (a) Presence of another substance use disorder (alcohol, other illicit or prescription drug dependence), diagnosed by specialist clinical assessment, including urine drug screen (UDS);

*Patients taking disulfiram for the treatment of alcohol dependence should be excluded due to the possible interaction with the small amounts of alcohol in Sativex. However, patients with a past history of alcohol dependence who are now in remission should not necessarily be discriminated against from participating in the study. Rather, the study medical officer will explain the amount of alcohol in a typical Sativex dose used in this study (usually less than 0.5 gm alcohol per dose or 0.2 standard drink per day), and then discuss with the patient the relative relapse risks. Of course, many individuals with a past history of alcohol dependence and in remission do not strictly adhere to abstinence from alcohol, and many such individuals may consider the risks of participating as acceptable. Others may want to remain completely abstinent from alcohol and avoid even small amounts of alcohol associated with Sativex. Hence in summary, past alcohol dependence in remission is not an automatic exclusion criteria, but will be individualised with each participant.*

- (b) severe medical (e.g. chronic pain, hepatic or cardiovascular disease, severe renal impairment) or psychiatric disorder (e.g. schizophrenia, recent drug-induced psychosis, severe affective disorder), assessed by the study medical officer;

- (c) pregnant or lactating women (urine  $\beta$ -hCG);

- (d) concerns regarding safe storage of medication (e.g. unsuitable home environment or significant child protection concerns);

- (e) not available for follow-up (e.g. likely travel or imprisonment).

- (f) Mandated by court to attend cannabis treatment.

- (g) History of epilepsy or recurrent seizures.

- (h) Currently in Court mandated treatment (e.g. MERIT, Adult Drug Court)

- (i) Current active treatment for cannabis use disorder

*Clients in existing treatment (e.g. Specialist Cannabis Clinics (SCC), other D&A services, private psychologist or psychiatrist): Clients already engaged and participating in counselling and/or medication based treatment for their cannabis use disorders are not eligible for the trial at the time of application. This includes a range of medications that are sometimes prescribed for cannabis use disorders (despite minimal evidence base), such as antidepressant or antipsychotic medications. To participate, clients would have to choose to cease their existing treatment (counselling, medication) for a 4 week period prior to being formally assessed for the trial.*

901 *Clients entering treatment (through Intake or routine screening for trial):* In other  
902 circumstances, a cannabis dependent client may contact services (e.g. a specialist  
903 cannabis clinic, D&A Intake, routine screening for trial) and be unclear or ambivalent  
904 regarding their desired treatment choices. It is appropriate under such circumstances  
905 for the SCC clinician to comprehensively assess the client, discuss treatment options and  
906 develop a treatment plan, which may include participation in the Sativex RCT (note that  
907 structured CBT as routinely provided by SCCs is a component of the Sativex RCT).

908  
909 *Clients engaging in other forms of treatment for related conditions.* Clients may already  
910 be participating in treatment for conditions that may be related to their cannabis use  
911 disorder – but that does not specifically address cannabis use as the target of the  
912 intervention. This may include psychosocial interventions or pharmacotherapies for  
913 depression, anxiety, sleep or relationship problems, or physical interventions for related  
914 respiratory, sleep or pain disorders.

915  
916 Under such circumstances, the assessing study clinician should get consent from the  
917 client to communicate with the treating clinician, and clarify the nature and purpose of  
918 the existing treatment. Participation in an alternative treatment that does not primarily  
919 target cannabis use disorder is not grounds for exclusion. Where possible, participants  
920 should be encouraged to stay in ‘stable’ treatment (e.g. medication doses, counselling)  
921 for other conditions as required for the other condition. Where in doubt, discuss the  
922 case with the site investigator.

923  
924  
925 These criteria aim to exclude individuals with concurrent conditions that jeopardise safety or  
926 confound data interpretation.  
927

#### 928 **3.4.2 Subject Numbers and power calculations**

929  
930 Psychotherapy treatment studies for cannabis achieve abstinence rates of 12 to 23% (mean,  
931 20.8%) over follow-up periods from 2-6 months,<sup>14</sup> and medication studies are similar (~23.1%  
932 abstinence).<sup>8,22</sup> We thus base our power analysis on the assumption that the Placebo group will  
933 achieve abstinence rates at 12-weeks of ~22%. We predict that the addition of Sativex to  
934 psychotherapy will double abstinence rates to approximately 44%. This estimate is based upon  
935 findings from a laboratory relapse model, in which heavy cannabis users consumed less than half the  
936 amount of cannabis (mean 43% less, range 39-48%) following repeated doses of nabilone, relative to  
937 placebo treatment.<sup>19</sup> With 80% power (two tailed) and  $\alpha=0.05$ , a total of 142 participants (71 per  
938 group) are needed to detect the predicted benefits in cannabis abstinence.  
939

#### 940 **3.5 Recruitment procedures**

941 The summary of recruitment procedures is detailed in Figure 6 and more details about  
942 recruitment to this project are given in section 4. In brief, participants will initially be screened in a  
943 telephone interview by research staff. Those broadly eligible will be medically assessed by an  
944 Addiction Medicine Specialist, including a structured clinical history, physical and mental state  
945 examination and relevant investigations, including onsite urine testing to exclude pregnancy and to

946 confirm recent THC use. Eligible participants will attend a research interview for written informed  
947 consent, baseline data collection and randomisation.

948

949 Participants will be recruited via D&A services of SESLHD, WSLHD or HNELHD. All three LHDs have  
950 large D&A services, including Specialist Cannabis Clinics targeting clients with cannabis use disorders.  
951 Recruitment will be supplemented by advertisements (flyers) in local primary care services, NGOs  
952 and Emergency Departments, and media advertisements in local popular press. Similar procedures in  
953 previous cannabis pharmacotherapy trials at these sites have recruited 5 to 8 subjects per month.<sup>8,49</sup>  
954 As such we anticipate that this study will recruit the required 142 subjects in 18 months.

### 955 **3.5.1 Eligibility assessment: telephone screening**

956 Clients interested in participating in the study will undergo a detailed phone screen interview by  
957 CIB or his delegate based at the University of Sydney, or the RA at Newcastle, and if eligible, will be  
958 scheduled for face to face eligibility assessment by the trial MO's. The detailed phone screen will  
959 include information regarding:

- 960 • Demographic characteristics (e.g., age, sex, housing, employment, education)
- 961 • Whether the potential participant has been mandated by a court diversion program to seek  
962 cannabis treatment (in which case they are not eligible).
- 963 • Cannabis Severity of Dependence Scale SDS;<sup>50,51</sup>
- 964 • Other drug use in last 28 days, including alcohol use
- 965 • Drug treatment in last 28 days
- 966 • Mental health (anxiety, depression, bipolar & schizophrenia)
- 967 • Prior unsuccessful quit attempts
- 968 • Pregnancy / contraception status
- 969 • Willingness to adhere to study procedures
- 970 • Willingness to enter into a blinded placebo vs active drug randomised controlled trial

971

### 972 **3.5.2 Medical eligibility assessment day (2-3 hours)**

973 On presentation for a clinical assessment, a standard comprehensive clinical assessment  
974 using SESLHD, HNELHD or WSLHD D&A Services Assessment Modules will be completed by the  
975 assessing clinician. The face to face medical examination and eligibility check will take place at either  
976 the Langton Centre, the Cannabis Clinic at Sutherland/St George, the Centre for Addiction Medicine  
977 at Westmead, or the Newcastle Community Health Centre (Hunter New England Clinical Drug and  
978 Alcohol Services Site). Participants will be met by the RA at each site and will sign informed consent  
979 to take part in the medical assessment. All participants will then undergo a medical eligibility  
980 assessment by a trial MO including:

- 981 • A comprehensive substance use and medical history, including physical and mental state  
982 examinations (including psychosis assessment), and completion of ICD10 cannabis dependence  
983 criteria checklist,
- 984 • clinical diagnoses and special investigations where clinically indicated, including urine samples for  
985 UDS and  $\beta$ hCG (to exclude pregnancy in women).

986

987 Clients will be informed of the outcome of the assessment (including relevant investigations)  
988 immediately by MO or within 3 working days by the Trial Coordinator/RA, and randomisation/ study  
989 admission meeting booked (generally within 2 weeks of eligibility assessment). For those patients

990 who are not eligible or choose to not participate in the study, alternative treatment options will be  
 991 organised as clinically appropriate.  
 992

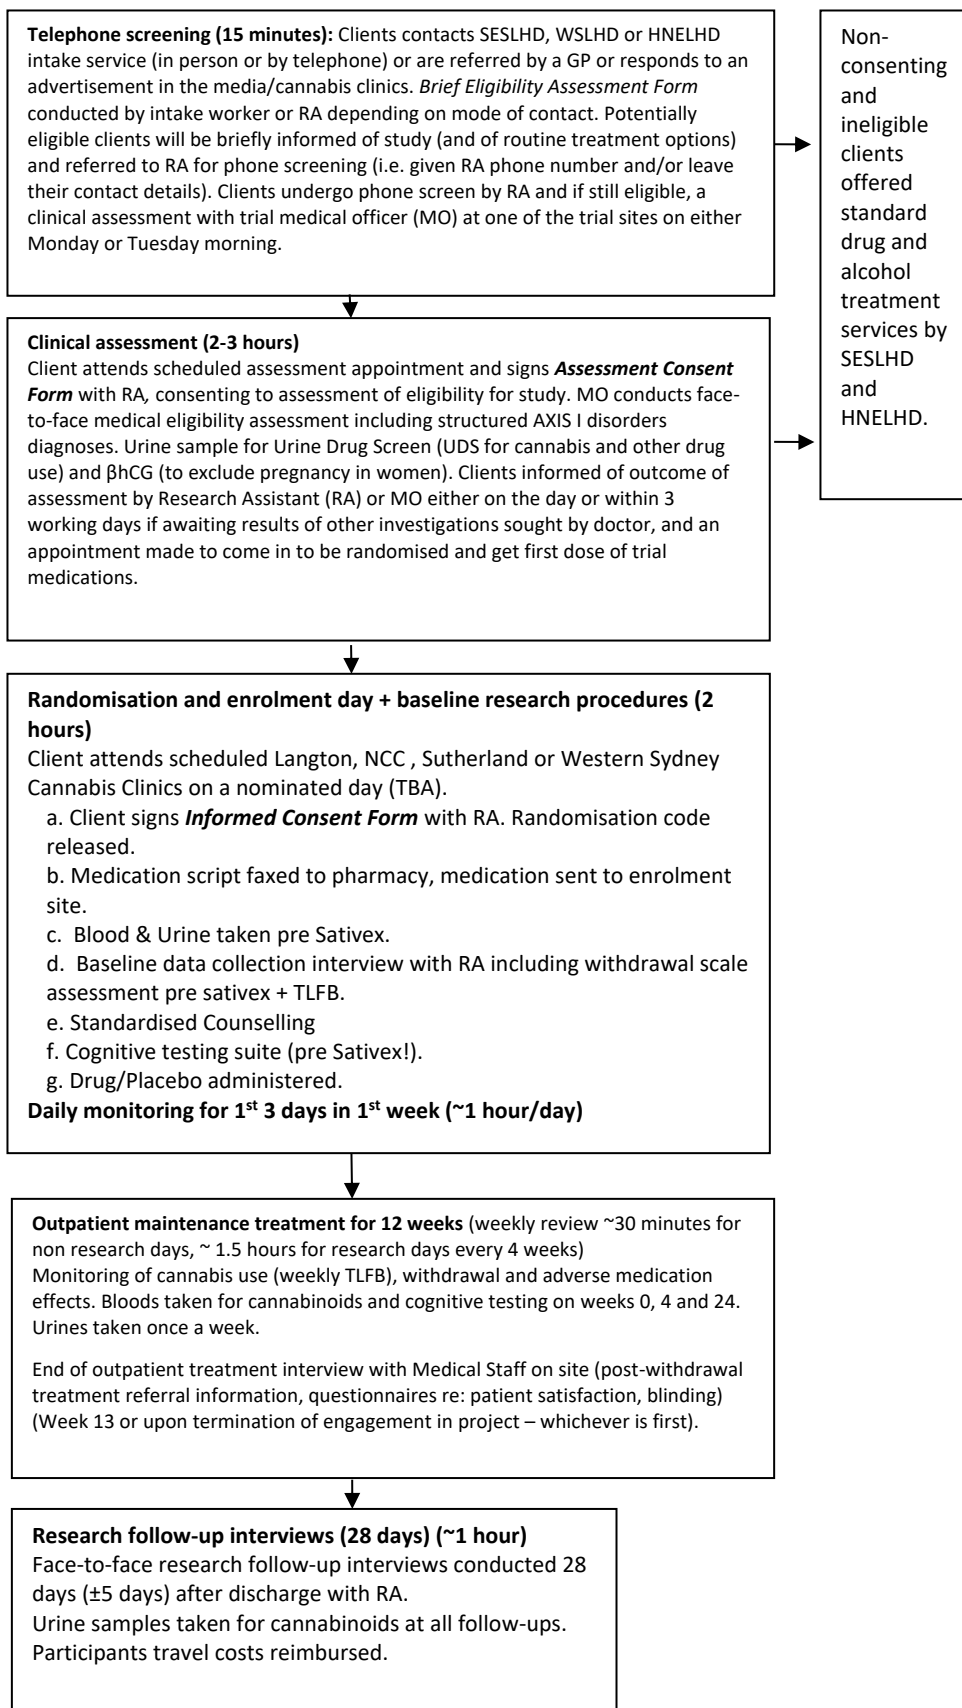

993 **Figure 6 Overview of recruitment and trial procedures**

### 994 3.6 Informed consent

995 The details of the clinical trial protocol will be discussed with each potential participant and  
996 written informed consent obtained prior to any trial-related procedure being performed. A copy of  
997 the *Participant Information Sheet* and signed *Consent Forms* will be provided to each potential  
998 participant prior to commencing any trial-related procedure. There will be two consent forms used.  
999 The first consent form (*Sativex Participant Medical Screening Consent Form*) will be to provide  
1000 informed consent for the medical assessment and collection of urine samples for eligibility screening,  
1001 collected by the trial MO. The second consent form (*Study Consent Form*) will be completed  
1002 immediately prior to commencement of all subsequent study procedures, and will be completed with  
1003 a Research Assistant (RA).  
1004

### 1005 3.7 Randomisation and blinding

1006 The study design complies with requirements of the Consolidated Standards of Reporting Trials  
1007 (CONSORT) statement for conducting randomised controlled trials. The randomisation schedule will  
1008 be developed by an independent statistician. Eligible participants will be randomised in a 1:1 ratio  
1009 between groups using variable block randomisation to help maintain blinding,<sup>8</sup> with subjects  
1010 stratified by site. Sativex and placebo will be packaged in labelled containers with the subjects ID  
1011 number and site. Aside from trial pharmacists, no other member of the team or clinical staff will  
1012 know the allocation of treatment condition. Master randomisation lists will be available if the blind  
1013 needs to be broken.  
1014

1015 Participants, clinicians and researchers involved in service delivery, data collection and analysis  
1016 will remain blinded to study condition (active or placebo medication) by the use of placebos  
1017 manufactured by the pharmaceutical company providing the medication and placebo, in  
1018 combination with the trial pharmacists at both sites. All medications will be packaged into identical  
1019 spray bottles using an alcohol base and peppermint flavouring. Our previous Sativex / placebo study<sup>8</sup>  
1020 indicated that the blind was effectively maintained using these procedures.  
1021

1022 The randomisation schedule will be made available to the trial pharmacists and DSMB only. The  
1023 trial pharmacists will label medications in sequential and sealed opaque plastic spray vials according  
1024 to the randomisation schedule. Each vial will be labelled as clinical trials medication, printed with the  
1025 trial code name (SatCom - for Sativex in the community), HREC approval code (TBA), site principal  
1026 investigators name (Dr Nick Lintzeris at Langton, Dr Adrian Dunlop in Newcastle, Dr Nghi Phung in  
1027 Western Sydney), expiry date (listed on batch number form supplied by GW), and Subject ID (which  
1028 links to the randomisation schedule).  
1029

1030 As participants are enrolled in the study at each site, they will be dispensed according to these  
1031 previously packaged medication containers. Printed details of the container's contents will be  
1032 removed by the trial pharmacist prior to delivery to trial site to maintain blinding. In this way,  
1033 clinicians, participants and research staff involved in treatment delivery and data collection will not  
1034 have access to the randomisation schedule or be able to influence group allocation.  
1035

1036 In cases where the allocation needs to be 'unblinded' (e.g. Severe Adverse Event), CIA or CIF  
1037 (senior trial MO's) or their nominee, will be able to break the blind for that particular participant in  
1038 consultation with the trial pharmacist holding the unblinded randomisation codes, or the DSMB, who  
1039 will also hold the unblinded randomization codes.  
1040



1041 **3.8 Trial interventions**

1042 **3.8.1 Study sites**

1043 The trial is to be conducted at four specialist outpatient D&A services experienced in delivering  
1044 treatment interventions to cannabis dependent clients. The sites are The Langton centre, St George  
1045 Hospital, Centre for Addiction Medicine at Westmead, and Hunter New England Clinical Drug and  
1046 Alcohol Services Site (Newcastle Cannabis Clinic).

1047 **3.8.2 Trial medications: Supply, Distribution & Dispense**

1048 Active and placebo medications will be provided by GW Pharmaceuticals (UK). Sativex is dispensed  
1049 in 10 ml containers (bottles), each delivering 90 metered sprays of 100 µL (2.7 mg THC and 2.5 mg  
1050 CBD). The placebo medication consists of the alcohol base and peppermint oil flavouring present in  
1051 the active Sativex medication, except all cannabinoids and plant based terpenoids are not present.  
1052 The placebo looks and smells just like Sativex.

1053 GW Pharmaceuticals will dispatch trial medications in batches as required depending upon  
1054 recruitment rates at each site. The initial batch will be delivered to Langton Centre (the first clinical  
1055 site up and running), with a batch size of:

1056  
1057 800 vials of Sativex and 800 vials of placebo.

1058  
1059 Vials will be packed into 24 cardboard boxes (each box size: 270x165x160mm ) – they will be packed  
1060 as follows:

1061  
1062 Active: 11 boxes of 72 vials each + 1 box of 8 vials  
1063 Placebo: 11 boxes of 72 vials each + 1 box of 8 vials

1064  
1065 This first shipment will be distributed amongst the clinical sites as needed (as they come online with  
1066 recruitment activity) from the Langton Centre.

1067  
1068 The trial pharmacists will be responsible for labelling of medication bottles used in the trial.  
1069 Trial pharmacists will receive boxes of brown opaque spray bottles, with each box labelled either  
1070 sativex or placebo. Labelled boxes will be transported from the UK to each of the four study sites  
1071 (Langton, St George Hospital, Newcastle Community Health Centre, and Cumberland Hospital). A  
1072 separate Commonwealth license will be issued for each batch consignment in the name of the Chief  
1073 medical officer at each site.

1074  
1075 Sativex and placebo will be labelled by the trial pharmacist and their staff at each site using the label  
1076 below to identify the bottles (Appendix A). All bottles containing Sativex will be stored in secure S8  
1077 refrigerators at each clinical site pending prescription to a patient. Placebo bottles will be stored in  
1078 non-S8 refrigerated conditions on site.

1079

1080 **3.8.2.1 Accountability of trial medications**

1081 All medications and placebo medications received and dispensed as part of this trial will be  
1082 inventoried and accounted for throughout the trial on the study medication log by the clinical trials  
1083 pharmacists, and by nursing staff administering the medication at each site. Each 10ml vial of Sativex  
1084 or placebo will be primed when it is the first spray from a new bottle, by pumping a full spray into a  
1085 paper towel, which will then be discarded. Participants will be instructed on the correct buccal  
1086 application of the medication.

1087 As the medication and placebo are liquids held in opaque spray bottles, participants will be  
1088 asked to maintain a daily dosing diary to keep track of the number of sprays delivered from each

1089 bottle (See below). This will also assist in assessing medication use and aberrant behaviours over the  
1090 trial. Medication bottles will be weighed at each dispensing visit for unauthorised dose escalation or  
1091 diversion (use of >20% of maximum dose prescribed). Three such instances of aberrant medication  
1092 use over the course of the trial will result in study termination.

1093  
1094

#### *Sativex Trial Drug Register Procedures*

1096 Upon randomisation, individual patients will be prescribed a generic study script by the doctor (See  
1097 Appendix B). The script will be filled on site as the pharmacist receives the named patient script, and  
1098 will be dispensed to the patient by a study nurse. A dedicated S8 requisition book and a dedicated S8  
1099 Drug Register will be used for the study at each of the four clinical sites. The trial pharmacist at each  
1100 site will be responsible for compiling and maintaining a Drug Register as seen Appendix C.

1101  
1102

#### **Return of used or ‘complete treatment’ containers**

1104 Used containers must be returned to the pharmacist once a patient completes medication.  
1105 Entries in the register should state “Returned to Pharmacy” date and be weighed.

1106

#### **3.8.3 Trial medications & Route of administration: Sativex and placebo**

1108 Sativex and Placebo are administered as sprays into the oral cavity whereupon they are  
1109 absorbed through the oral mucosa.

1110 All medications will be dispensed by trial pharmacists at the participating clinics.

1111 Dosing regimens are described in detail below. Doses of up to 8 sprays will be delivered up to 4  
1112 times a day, titrated to individual need. This is based upon the product information,<sup>35</sup> published  
1113 literature, and our inpatient trial where this dose suppressed withdrawal and was well tolerated.<sup>8</sup>  
1114 Whilst the dose is higher than recommended for multiple sclerosis (up to 12 sprays per day in total  
1115 with maximum 7 sprays per individual dose),<sup>35</sup> high doses are required to achieve therapeutic  
1116 objectives (suppression of illicit cannabis use) in this cannabis dependent population. Sativex is a  
1117 relatively short acting medication,<sup>28</sup> requiring up to 4 doses per day, preventing complete supervised  
1118 dosing. Medication will be dispensed once a week from the clinics. Doses will be supervised during  
1119 weekly clinic visits for compliance and safety assessments.

1120 The spray container should be shaken before use and the spray should be directed at  
1121 different sites inside the mouth changing the application site each time the product is used.  
1122 Patients should wait for a period of 2-3 second between sprays to allow time for the  
1123 medication to be absorbed through the oral mucosa.

1124 It might take up to two weeks to find the optimal dose and that undesirable effects can  
1125 occur during this time, most commonly dizziness. These undesirable effects are usually mild  
1126 and resolve in a few days. However, the trial doctor will consider maintaining the current  
1127 dose, reducing the dose or interrupting, at least temporarily, the treatment depending on  
1128 seriousness and intensity.

1129 To minimise variability in the effects of the drug Sativex should be taken at  
1130 approximately the same time each day, standardised as far as possible in relation to food  
1131 intake (i.e. take 30 minutes before eating). Please allow a minimum of a 2 second time frame  
1132 between each spray administered into the mouth to allow time for the spray to be absorbed  
1133 through the lining of the cheeks.

1134

## 1135 3.8.3.1 Week 1: Induction, dose titration, and risk assessments

1136 As with many psychoactive medications, Sativex doses need to be titrated against individual  
 1137 response, particularly early in treatment as patients become tolerant to the effects of the  
 1138 medication. The first week involves regular review and dose titration, such that the patient has  
 1139 achieved their stable dose by Wk 2. Thereafter, the preferred regimen is in 8 unit daily integers (2 u  
 1140 QID (8/day); 4 u QID (16/day); 6 u QID (24/day); 8u QID (32/day). The proposed dosing regimen for  
 1141 Sativex is shown in following table.  
 1142

| Day              | Reviewed by | Prescription                                                                                          | Instruction                                                                                                                                                                                          | Dispense                                                                                                                              |
|------------------|-------------|-------------------------------------------------------------------------------------------------------|------------------------------------------------------------------------------------------------------------------------------------------------------------------------------------------------------|---------------------------------------------------------------------------------------------------------------------------------------|
| 1                | M.O.        | Day 1, 2 sprays QID<br>Day 2-3, may increase to 4 sprays QID<br>Day 4-7, may increase to 8 sprays QID | 2 sprays QID                                                                                                                                                                                         | 2 bottles<br>(Max doses:<br>D 1: 8<br>D2: 16<br>D3:16<br>D4:32<br>D5:32<br>D6: 32<br>D7:32                                            |
| 2                | Nurse       |                                                                                                       | Take xx sprays QID<br>Miss dose if intoxicated. Reduce dose at next administration.<br>Maintain dose if comfortable, with minimal cravings or withdrawal.<br>Increase dose if cravings or withdrawal | Weigh bottles & return to client                                                                                                      |
| 3                | Nurse       |                                                                                                       | Take xx sprays QID<br>Miss dose if intoxicated. Reduce dose at next administration.<br>Maintain dose if comfortable, with minimal cravings or withdrawal.<br>Increase dose if cravings or withdrawal | Weigh bottles & return to client                                                                                                      |
| 8                | M.O.        | Assess dose adequacy.<br>Prescribe either 2, 4, 6 or 8 sprays QID                                     | Take xx sprays QID<br>Miss dose if intoxicated. Reduce dose at next administration.<br>Maintain dose if comfortable, with minimal cravings or withdrawal.<br>Increase dose if cravings or withdrawal | Weigh & keep all used bottles.<br>Dispense as per dose:<br>1 bottle: 8 - 12 u/day<br>2 bottles: 16-28 u/day<br>3 bottles: 30-32 u/day |
| 15 & later weeks | M.O.        | Assess dose adequacy.<br>Prescribe either 2, 4, 6 or 8 sprays QID                                     | Repeat as per Day 8                                                                                                                                                                                  | Repeat as per day 8                                                                                                                   |

1143

1144

1145 As per the above table, week 1 doses are: Day 1: up to 2 sprays 4 times a day (QID); Day 2-3: May  
 1146 increase to 4 sprays QID; Days 4-7: May increase up to 8 sprays QID.  
 1147

1148 Subjects will attend clinics daily during week 1 for clinical review, safety/risk assessments and a  
1149 supervised dose. Subjects will be monitored for 5 minutes prior (trough effects), and 20-30 minutes  
1150 after the supervised dose to clinically assess intoxication and dose adequacy. Clinical data collection  
1151 will include: patient report of number of Sativex/placebo doses and any other substances used since  
1152 last review; at each review the nurse or medical clinician will rate a 5 point likert scale their global  
1153 assessment of whether the client is in severe withdrawal (1), mild withdrawal (2), stable (3), mild  
1154 intoxication (4) or severe intoxication (5). For clients who are assessed as having any withdrawal or  
1155 intoxication evident, the clinician will conduct a history of recent Sativex dosing and other substance  
1156 use, and perform the following clinical assessments:  
1157

- 1158     ▪ Blood pressure
- 1159     ▪ Pulse rate
- 1160     ▪ Assessment of eye signs (red eyes, dilated or constricted pupils, nystagmus)
- 1161     ▪ Behavioural features of intoxication (sedation, slurred speech, ataxia, reddened sclera) or  
1162         withdrawal (e.g. speech, gait, anxiety, restlessness, agitation)
- 1163     ▪ Breath alcohol concentration
- 1164     ▪ Urine test if indicated (suggest use instant ‘dip sticks’ for rapid result but also send for routine  
1165         UDS – *but exclude cannabis from these tests in order to maintain the study blind*)

1166 Features of withdrawal or intoxication may warrant review of the client’s medication and dose.  
1167

1168             Clinical review will also assess adverse events; and aberrant medication use. Medication  
1169 bottles will be weighed at each dispensing visit for unauthorised dose escalation or diversion (use of  
1170 >20% of maximum dose prescribed). Three such instances of aberrant medication use over the  
1171 course of the trial will result in study termination.  
1172

### 1173 3.8.3.2 Weeks 2-12 (eleven weeks): Maintenance phase

1174             Doses during the maintenance phase will be based upon the dose determined at the end of  
1175 week 1, and individually titrated up to a maximum of 8 sprays, four times per day. Subjects should be  
1176 prescribed either 2, 4, 6 or 8 sprays QID for subsequent weeks, with clinical review, and they will  
1177 attend clinics weekly to renew medication, have medication bottles weighed for above maximum  
1178 prescribed dose used, provide UDS, and to undergo case management, clinical review, TLFB and  
1179 counselling as described above.  
1180

1181             In addition to the usual nursing counselling, the routine 6-session manualised CBT program  
1182 developed by NCPIC will be used for all participants in the trial (Appendix D). Counsellors are to co-  
1183 ordinate 6 appointments over the 12 week medication course.  
1184

1185             Fidelity to counselling: to ensure fidelity with counselling approaches,  
1186

1187             (a) all counsellors participating in the trial will participate in training sessions to be organised in early  
1188 2016 prior to commencement of the Newcastle, Parramatta and St George sites.

1189             (b) all counselling sessions will be tape recorded using a digital recorder. A random selection (10%) of  
1190 all scheduled counselling sessions will be selected for fidelity scoring by experienced raters

1191 experienced in delivering cannabis CBT –based interventions. Up to 80 sessions will be monitored in  
1192 this manner.  
1193  
1194

1195 *3.8.3.3 Week 13: Dose tapering and withdrawal.*

1196 The final week of medication, after the maintenance phase (and week-12 outcome assessment)  
1197 is completed, will involve daily clinic attendance, dose reduction of approximately 10-20% of  
1198 maintenance dose each day, monitoring of withdrawal severity (CWS)<sup>32</sup> and adverse events. The dose  
1199 taper should minimise any discontinuation withdrawal effects: our previous study showed that a 3-  
1200 day dose taper from 32 sprays per day was not associated with significantly rebound withdrawal (Fig.  
1201 2A), consistent with other published other reports on Sativex discontinuation.<sup>35</sup>  
1202  
1203  
1204  
1205  
1206  
1207  
1208  
1209  
1210  
1211  
1212

3.8.3.4 Table of schedule of events.

| TIMEPOINT*                                                                                                                                                                                                                                                                                                       | STUDY PERIOD    |           |                 |     |     |     |     |     |     |     |     |          |          |          |          |               |
|------------------------------------------------------------------------------------------------------------------------------------------------------------------------------------------------------------------------------------------------------------------------------------------------------------------|-----------------|-----------|-----------------|-----|-----|-----|-----|-----|-----|-----|-----|----------|----------|----------|----------|---------------|
|                                                                                                                                                                                                                                                                                                                  | Screen          | Enro<br>I | Post-allocation |     |     |     |     |     |     |     |     |          |          |          |          | Follo<br>w-up |
|                                                                                                                                                                                                                                                                                                                  | -t <sub>1</sub> | 0         | Wk<br>1         | Wk2 | Wk3 | Wk4 | Wk5 | Wk6 | Wk7 | Wk8 | Wk9 | Wk<br>10 | Wk<br>11 | Wk<br>12 | Wk<br>13 | Week<br>24    |
| <b>ENROLMENT:</b>                                                                                                                                                                                                                                                                                                |                 |           |                 |     |     |     |     |     |     |     |     |          |          |          |          |               |
| Phone screen (Eligibility)                                                                                                                                                                                                                                                                                       | X               |           |                 |     |     |     |     |     |     |     |     |          |          |          |          |               |
| Informed consent for medical screen                                                                                                                                                                                                                                                                              | X               |           |                 |     |     |     |     |     |     |     |     |          |          |          |          |               |
| Medical screen/assessment (Eligibility)                                                                                                                                                                                                                                                                          | X               |           |                 |     |     |     |     |     |     |     |     |          |          |          |          |               |
| Informed consent for main study participation                                                                                                                                                                                                                                                                    |                 | X         |                 |     |     |     |     |     |     |     |     |          |          |          |          |               |
| Allocation                                                                                                                                                                                                                                                                                                       |                 | X         |                 |     |     |     |     |     |     |     |     |          |          |          |          |               |
| <b>INTERVENTION:</b>                                                                                                                                                                                                                                                                                             |                 |           |                 |     |     |     |     |     |     |     |     |          |          |          |          |               |
| Medication [Nabiximols or placebo] dispensed                                                                                                                                                                                                                                                                     |                 |           | X               | X   | X   | X   | X   | X   | X   | X   | X   | X        | X        | X        | X        | X             |
| Nursing clinical reviews                                                                                                                                                                                                                                                                                         |                 |           | X               | X   | X   | X   | X   | X   | X   | X   | X   | X        | X        | X        | X        | X             |
| Medical clinical reviews                                                                                                                                                                                                                                                                                         |                 |           | X               | X   |     | X   |     |     |     | X   |     |          |          | X        |          |               |
| Psychotherapy                                                                                                                                                                                                                                                                                                    |                 |           |                 | X   |     | X   |     | X   |     | X   |     | X        |          | X        |          |               |
| Urine drug screen <sup>2</sup>                                                                                                                                                                                                                                                                                   |                 | X         | X               | X   | X   | X   | X   | X   | X   | X   | X   | X        | X        | X        | X        | X             |
| <b>ASSESSMENTS:</b>                                                                                                                                                                                                                                                                                              |                 |           |                 |     |     |     |     |     |     |     |     |          |          |          |          |               |
| <b>Phone screen. Variables include:</b><br>Demographics, Cannabis SDS, Alcohol SDS, mATOP, Drug treatment, Mental health, Prior unsuccessful quit attempts, Pregnancy/ contraception status                                                                                                                      | X               |           |                 |     |     |     |     |     |     |     |     |          |          |          |          |               |
| <b>Research Interviews. Variables include:</b><br>Cannabis & other substance use (TLFB), CWS, AEs, Aberrant medication behaviour (mod ORBIT), SF-6D (QOL), WHO Health and Performance Questionnaire: CT version, SF-36 (Physical and Mental health), DASS-21, PHQ-15, OTI: Crime, Satisfaction & test blind/dose |                 | X         |                 |     |     | X   |     |     |     | X   |     |          |          | X        |          | X             |
| <b>Clinical (Nursing/medical) Review variables<sup>1</sup>:</b><br>ATOP every 4 weeks (recent substance use, risk assess, physical, mental health & QOL), AEs, Aberrant medication behaviour (weigh bottles), dose adequacy                                                                                      |                 |           | X               | X   | X   | X   | X   | X   | X   | X   | X   | X        | X        | X        | X        | X             |
| <b>Cognitive assessment<sup>3</sup>. Variables include</b><br>Blood samples (pre/post cognitive testing), Cognitive testing, Abuse liability (subjective liking, strength, Physiological response)                                                                                                               |                 | X         |                 |     |     | X   |     |     |     |     |     |          |          |          |          | X             |

<sup>1</sup> Once a week nursing clinical reviews. Will coincide with medication dispensing & UDS collection

<sup>2</sup> Collected once a week – coincides with medication dispensed once a week.

<sup>3</sup> During treatment phase, assessments conducted pre (rough) and post (peak) dosing. Single sessions at Wk 24.

1217

#### 1218 **3.8.4 Adjunct medications: Nicotine Replacement Therapy**

1219 All participants will be offered prescriptions for nicotine replacement therapy (NRT) either in the form of 16-  
1220 hour patches (7, 14 or 21mg) and/or nicotine chewing gum or lozengers. NRT patches are to be removed at  
1221 8pm daily, to avoid abnormal dreams (Thompson and Hunter 1998). Utilisation of NRT will be documented in  
1222 the patient's medical records and costs to patients itemised and included in the CEA.

1223

#### 1224 **3.8.5 Psychosocial interventions.**

1225 All subjects will be provided with a minimum of 6 structured 40-50 minute counselling sessions over the  
1226 12 week medication phase, based on CBT and motivation enhancement for relapse prevention, consistent  
1227 with identified best practice in this area (see Appendix D).<sup>52</sup> Trained nurses or counsellors will deliver the  
1228 counselling interventions according to a manual that will be created by the CI team in consultation with  
1229 nurses and counsellors of the various services.

1230

#### 1231 **3.8.6 Clinical reviews, case management and monitoring**

1232 Subjects will be reviewed daily for the first 3 days during week 1 and at least weekly thereafter by  
1233 experienced D&A nurses. Medical reviews will occur during weeks 1, 2, 4, 8, and 12 with additional reviews  
1234 as indicated. Structured clinical assessments will include the ATOP<sup>53</sup> (part of electronic Medical Records  
1235 documentation and a CRF) conducted 4 weekly – a validated clinician completed instrument that includes  
1236 client ratings of physical and mental health and assesses a range of clinical risks (e.g. child protection,  
1237 violence, homelessness). Where a clinician has concerns regarding the client's well-being due to suicidal  
1238 ideation, they will complete the NSW Health D&A Clinical Documentation eMR CHOC Form "Assessment of  
1239 Harm to Self or Others", as per routine practice, and escalate the case to the study medical officer, and site  
1240 investigator as clinically appropriate. Such cases may require referral to appropriate emergency or mental  
1241 health services, consistent with NSW Health policy directive. Depressive symptoms will be closely monitored  
1242 at these reviews and if symptoms of depression are observed to clinically significantly worsen, or if suicidal  
1243 ideation appears, the blind will be broken for that patient and they will be removed from the study (i.e.  
1244 Sativex or placebo administration will cease under careful clinical care). Participants discontinued from the  
1245 study for any reason (e.g. withdrawn consent, or due to administrative or medical discharge) will continue to  
1246 receive clinical services as appropriate. In the case of participants who are discontinued from the study due  
1247 to deteriorating medical condition, the addiction medicine staff specialist will be responsible for co-  
1248 ordinating appropriate clinical care – which may involve alternative D&A treatment services, and/or referral  
1249 to other services as clinically appropriate. Urine Drug Screens (UDS) will be collected once a week over the  
1250 12 weeks (at approximately the same time each week relative to dosing – e.g. in the am) to assess illicit  
1251 cannabis and other substance use and a weekly TLFBS self report cannabis use will also be collected. Standard  
1252 D&A treatment case management will be implemented over the study period.

1253

1254 At each review the nurse or medical clinician will rate a 5 point likert scale their global assessment of  
1255 whether the client is in severe withdrawal (1), mild withdrawal (2), stable (3), mild intoxication (4) or severe  
1256 intoxication (5). For clients who are assessed as having any withdrawal or intoxication evident, the clinician  
1257 will conduct a history of recent Sativex dosing and other substance use, and perform the following clinical  
1258 assessments:

1259

1260 ▪ Blood pressure

1261

1261 ▪ Pulse rate

1262

1262 ▪ Assessment of eye signs (red eyes, dilated or constricted pupils, nystagmus)

1263

1263 ▪ Behavioural features of intoxication (sedation, slurred speech, ataxia, reddened sclera) or withdrawal  
1264 (e.g. speech, gait, anxiety, restlessness, agitation)

1264



- 1265     ▪   Breath alcohol concentration
- 1266     ▪   Urine test if indicated (suggest use instant ‘dip sticks’ for rapid result but also send for routine UDS – *but*
- 1267         *exclude cannabis from these tests / order to maintain the study blind*)

1268   Features of withdrawal or intoxication may warrant review of the client’s medication and dose.

1269

### 1270         **3.8.7   Clinical care beyond medication phase.**

1271         Usual clinical care (counselling, case management and support) will be available as individually

1272         determined by the patient and treatment providers. Sativex will not be available to participants beyond the

1273         13-week medication phase of the trial.

1274

## 1275   **3.9   Urinalysis and blood pathology testing**

1276         Blood and urine samples will be collected in accordance with the *National Statement on Ethical*

1277         *Conduct in Human Research (2007)*. All blood and urine samples must be taken and stored de-identified

1278         using the patients study ID code. The individual pathology services at each unit will create custom order

1279         forms and protocols to be used with this study.

1280

1281   **Cannabinoid levels.** Plasma samples will be taken from all participants on weeks 0, 4 and 24 pre and post

1282   cognitive testing to determine serum cannabinoid (THC, 11-OH THC, THC-COOH, CBD, 7-OH CBD) levels .

1283

1284   **Blood Samples.** Blood specimens (10 ml) to be taken by a nurse or project staff and transported in BD

1285   lavender tops (EDTA tubes) from study sites: Stored at 4C and centrifuged within 24 hours (10 min at 1500 g

1286   or whatever is standard in the lab). Plasma should be aliquoted into 4 x 1 ml samples, into 1.5 ml eppendorf

1287   tubes or similar and stores in a freezer (-20 for 1 month or less, -70 for more than a month storage), until

1288   collected for transfer to Sydney University when they reach a total of at least 6 in a batch.

1289

1290   **Urine drug screens.** Urine samples will be taken weekly during drug treatment to confirm abstinence from

1291   cannabis and to chart cannabinoid metabolite profiles through time. Urines will be collected at times that

1292   participants attend clinical appointments, research interviews or to collect dispensed medications. All

1293   urinalyses will be conducted by the Psychopharmacology lab at Sydney University. Standard Urine Drug

1294   Screen instant dipsticks will be used at research interviews on weeks 0, 4, 8, 12 and 24 to verify cannabis use

1295   (at week 0 – baseline before any medications are administered) and to check other drug use other than

1296   cannabis at subsequent research interviews (i.e. a UDS that does not quantify THC will be used at weeks 4, 8,

1297   12 and 24).

## 1298   **3.10 Cognitive Testing**

1299

1300         Cognitive testing takes place 3 times, once at week 0 (baseline, before any drugs are administered), once

1301         at week 4, and once again at week 24 (follow-up interview).

1302

1303         **Primary objective:** To determine the effects of Sativex on cognitive processes relevant to

1304         occupational safety among individuals withdrawing from cannabis and on maintenance doses of

1305         replacement therapy. A between and within-subjects comparison of cognitive performance at peak- and

1306         trough-Sativex will be conducted using an array of cognitive tests that have been validated as sensitive to

1307         cannabis effects and as predictive of driving impairment.

1308

1309         **Secondary objective:** To determine whether administration of Sativex ameliorates cognitive deficits

1310         experienced during cannabis withdrawal and during the use of illicit cannabis in the community.

1311         If Sativex is successful in ameliorating symptoms of cannabis withdrawal, then it may conceivably be

1312         employed as an outpatient treatment in future. If this is the case, then it becomes important to consider

1313 some of the safety aspects of this medication: one issue of particular importance is the effects of these doses  
1314 of Sativex on cognition, particularly on those aspects of cognitive processing that are relevant to driving  
1315 performance.

1316

1317 Cannabis use has been demonstrated to impair cognitive function and real-world driving performance in a  
1318 dose-dependent fashion (Ramaekers, Berghaus, van Laar & Drummer, 2009). Recently, an international  
1319 consensus statement has provided guidelines for research on drugged driving (Walsh, Verstraete, Huestis &  
1320 Morland, 2008), and have provided a framework for selecting cognitive tests for studies seeking to predict  
1321 risks of crashes and accidents. These types of tasks also have general applicability to safety, and are  
1322 summarised in Table 1 below.

1323

1324 **Table 1:** Recommended cognitive measures for assessing potential impacts of medications on driving from  
1325 the Consensus Statement of Guidelines for Research on Drugged Driving (Walsh et al, 2008).

1326

| Behaviour Domain                                                            | Specific Activity                                                                                  | Test Applied in this Protocol                         |
|-----------------------------------------------------------------------------|----------------------------------------------------------------------------------------------------|-------------------------------------------------------|
| <b>Automotive behaviour<br/>(well-learned skills)</b>                       | Vigilance (staying alert for changes over long times)                                              | Rapid Visual Information Processing (RVP)             |
| <b>Control behaviour<br/>(maintaining distance, etc)</b>                    | Motor performance                                                                                  | Reaction Time (from neutral stimuli in Flankers task) |
| <b>Executive planning<br/>(interactive behaviours with ongoing traffic)</b> | Adaptive inhibition (e.g. stopping a lane change when hearing the horn of a car in your blindspot) | Stop Signal Task (SST)                                |
|                                                                             | Information processing                                                                             | Digit Symbol Substitution                             |
|                                                                             | Freedom from distraction                                                                           | Flankers task                                         |

1327

1328

1329 Importantly, the Guidelines statement also recommends that tests selected should have been validated as  
1330 sensitive to drug effects on driver performance, and have demonstrated predictive validity of driving  
1331 impairment (Recommendation B1: Walsh et al, 2008). The SST (or close analogues) have been demonstrated  
1332 to be sufficiently sensitive to reveal dose-dependent effects of THC across a range of plasma levels (1-  
1333 20ng/mL) in a double-blind, placebo-controlled, three-way cross-over study of recreational cannabis users  
1334 (Ramaekers et al, 2006). Moreover, the THC concentration-effect curves for performance impairment on  
1335 these tasks demonstrate a high correspondence with THC concentration-effect curves for THC-induced  
1336 culpability risk in epidemiological studies (Laumon et al, 2005), with THC-induced performance deficits and  
1337 THC-induced culpability risk highly correlated ( $r>0.85$ ) across a range of dose levels (0-20ng/mL). As such,  
1338 these cognitive tests may be reasonably taken to be valid measures to predict THC-induced crash risk in real-  
1339 world driving (Ramaekers et al, 2009).

1340

1341 In addition, meta-analyses of the residual effects of cannabis suggest that memory and learning are the two  
1342 components most strongly affected<sup>54</sup>. As such, standard tests of working memory (N-Back), as well as  
1343 acquisition, retrieval and storage of memory (RAVLT) will be included. A full description of the cognitive tasks  
1344 to be employed can be found in Appendix E.

1345

#### 1346 Procedure

1347 Cognitive testing will be performed at five time points.

- 1348 - week 0 (baseline, before any drugs are administered),
- 1349 - week 4 trough- and peak- (pre- and post- Sativex dosing)
- 1350 - week 24 (follow-up interview)

1351 The tasks are largely automated, following a pre-programmed battery for each of the three testing days.  
1352 Instructions for administering the test will be manualised, providing instructions for workers on site in

1353 relation to how to start and run each of the programs and code participant identification data, as well as a  
1354 detailed script for exactly how to explain each task so that the administration procedure is standardised.  
1355

### 1356 **3.11 Health Economics Data section**

1357 The health economic data will be comprised of data collected from participant clinic records for services  
1358 provided as trial interventions and from participants during research interviews at base line, (0), weeks 4, 8,  
1359 12 (maintenance phase) and week 24 (follow-up).

1360 Data to be collected from participants include

- 1361 • Quality Adjusted Life Years (QALY) measured by the SF-6D
- 1362 • Productivity through the WHO Health and Performance Questionnaire (Clinical Trials Version)  
1363 and
- 1364 • Past four week:
  - 1365 ○ Visits to hospitals, emergency department, and GP and specialist visits, etc.
  - 1366 ○ Criminal behaviors

1367 All health services will be costed with unit costs obtained from clinics, NSW Health Wages and Salaries, and  
1368 published data.

### 1369 **3.12 Participant satisfaction with medication and test of blind.**

1370 Assessment of dose adequacy and satisfaction with medication (e.g. rating of drug liking, good drug  
1371 effects, bad drug effects, “would you recommend to a friend” etc) will be assessed at research interviews.  
1372 Each participant will be asked to indicate whether they received active Sativex or placebo condition at the  
1373 Week 24 research interview to test the blind.  
1374

### 1375 **3.13 Research Interviews (~1.5 hours)**

1376 Research interviews will be conducted by the RA on weeks 0, 4, 8, 12 and 24 (day 28 following discharge  
1377 from study) at either of the four clinical study sites, using CRF D. For each interview, the following will be  
1378 administered:

- 1379 • TLFB – daily cannabis use since most recent follow-up
- 1380 • SDS (cannabis)
- 1381 • Cannabis Withdrawal Scale (CWS)
- 1382 • SF-36
- 1383 • Cannabis Problems Questionnaire
- 1384 • Reasons for Relapse to Cannabis Use Scale
- 1385 • Self-efficacy for Quitting Cannabis Questionnaire
- 1386 • Depression, Anxiety and Stress Scale-21
- 1387 • Insomnia Severity Index
- 1388 • Australian Treatment Outcomes Profile (ATOP)
- 1389 • Fagerstrom nicotine dependence scale
- 1390 • Physical Health Questionnaire (PHQ-15)
- 1391 • Brief Pain Inventory (BPI)
- 1392 • WHO Health and Performance Questionnaire (Clinical Trials Version) and
- 1393 • Health Services Utilisation Questionnaire
  - 1394 ○ Participation in treatment
    - 1395 ■ Past four week:
      - 1396 • Visits to hospitals, emergency department, and GP and specialist visits, etc.
  - 1397 • Participation in criminal activity in preceding 4 weeks (Opiate Treatment Index – OTI)
  - 1398 • Urine samples will be requested at face-to-face research interviews to corroborate self-reported  
1399 cannabis use via cannabis immunoassay and carboxy-THC:creatinine ratio. A positive cannabis

1400 urinalysis at follow-up will be indicated by the presence of cannabis metabolites in the concentration  
1401 50ng/ml or above.<sup>55</sup>

### 1402 **3.13.1 Enhancing research follow-up**

1403 Participants will undergo confidential interviews with the research officer at baseline (0), weeks 4, 8,  
1404 12 (maintenance phase) and week 24 (follow-up). The team will replicate strategies used in previous  
1405 research where high follow-up rates have been achieved (80-90% follow-up after discharge in recent  
1406 cannabis treatment studies).<sup>11,12</sup> Strategies to encourage follow-up attendance include: multiple points of  
1407 contact being collected for each participant, including home phone, mobile phone and email address and  
1408 contact details for a nominated contact person. Participants will be posted standardized letters and text  
1409 messages ahead of follow-up appointments, and staff will attempt to contact participants with up to 5 phone  
1410 calls before they will be classified as lost to study. Subjects will be reimbursed \$40 for travel and related  
1411 expenses to attend all research interviews.

### 1412 **3.13.2 Remuneration of participants**

1413 Subjects will be reimbursed \$40 for travel and related expenses to attend all research based interviews.

## 1414 **3.14 Discontinuation criteria**

1415 Upon termination of each participant from the trial, the “Reasons for Discharge CRF” will be completed by  
1416 the trial Medical Officer. Categories include involuntary or voluntary termination (as described below).

### 1417 **3.14.1 Involuntary termination**

1418 Termination criteria for individuals in the study are:

- 1419 • Medical reasons: the local trial MO in consultation with the CIA may terminate participation in the  
1420 event of clear evidence of an adverse event that warrants study discontinuation, or due to  
1421 deteriorating physical or mental health.
- 1422 • Administrative discharge for violation of treatment centre rules and conditions (e.g. evidence of  
1423 diversion or abuse of medication or other substance use; violence (or threats) towards staff or other  
1424 patients).
- 1425 • Non-compliance with trial protocol, including persistent refusal to participate in other trial  
1426 procedures (counselling, clinical reviews, case management urine drug screen (UDS), bloods,  
1427 monitoring).

1428  
1429 The treating team and participant should examine alternative treatment arrangements where practicable  
1430 prior to involuntary discharge from the trial clinical procedures.

### 1431 **3.14.2 Voluntary termination**

1432 Participants are free to withdraw their consent to participate in the trial at any time without fear of  
1433 reprisal. The site RA should be informed of any voluntary termination.

1434

### 1435 **3.14.3 Discontinuation and data collection**

1436 Statistical analyses will be conducted on an intention-to-treat basis. Data from participants  
1437 withdrawn from the trial will have their data included in statistical analyses. In addition, withdrawn  
1438 participants will be followed-up with the same instruments and at the same sequencing as participants not  
1439 withdrawn from the trial. Participants who are withdrawn from the trial will not be replaced if they have  
1440 consented and received a 1<sup>st</sup> dose of medication, but will be if they have consented and had no medication.

1441

1442 Participants who are withdrawn from the study either voluntarily or involuntarily may revoke their consent  
1443 to have their data included in the study. Participants opting to withdraw their consent for data inclusion  
1444 must complete a *Revocation of Consent Form*. Participants who revoke their consent for inclusion of their  
1445 data will not be replaced.

1446

1447 **3.15 Duration**

1448 The project will be completed in 3 years. The study will be conducted at large D&A treatment services  
 1449 from where subjects can be readily recruited. Collectively, SESLHD, WSLHD and HNELHD D&A Services  
 1450 delivered over 1,600 treatment episodes to patients with primary cannabis problems in 2013, and so a target  
 1451 recruitment rate of 80 per year is realistic.

1452 The project stages are:

1453

| ACTIVITY                                                                                                                                              | YEAR 1 | YEAR 2 | YEAR 3 |
|-------------------------------------------------------------------------------------------------------------------------------------------------------|--------|--------|--------|
| ESTABLISHMENT: 6 MONTHS (Finalise study protocols& ethics, staff recruitment and training)                                                            |        |        |        |
| RECRUITMENT, TREATMENT & DATA COLLECTION<br>Staggered recruitment (80/year, 40/site = 18 months),<br>treatment & follow-up of last recruit (6 months) |        |        |        |
| DATA ANALYSIS AND DISSEMINATION: 6 MONTHS                                                                                                             |        |        |        |

1454

1455 **4 Safety Monitoring & Reporting Protocols**

1456 **4.1.1 Definition & recording of adverse events in this trial**

1457 An adverse event is any untoward event that may inconvenience a study participant, staff member or  
 1458 other individual. The event may or may not be related to the treatment received within the framework of  
 1459 the study. This includes the onset of new illness and the exacerbation of pre-existing conditions. Additionally,  
 1460 any event that is associated with or observed in conjunction with a product overdose (whether accidental or  
 1461 intentional) or a product abuse and/or withdrawal is also considered an adverse event.

1462

1463 Each nursing clinical review, the reviewing nursing staff asks an open question (not checklist prompted)  
 1464 about whether the client has experienced any side effects since the last review. The severity of symptoms  
 1465 and the extent of impairment should be asked and documented using the following categories. Any rating of  
 1466 3 or more should be referred to the study medical officer for review, with grade 4 or 5 requiring immediate  
 1467 notification to the study medical officer for further assessment

1468

1469

| Adverse event rating                                                                                                          | Action                                |
|-------------------------------------------------------------------------------------------------------------------------------|---------------------------------------|
| 1 = mild and no impairment;                                                                                                   | Document & review at next appointment |
| 2 = mild symptom with mild impairment of function that does not require specific treatment or further assessment at this time | Document & review at next appointment |
| 3 = moderate symptom severity with mild impairment of function                                                                | Liaise with study medical officer     |
| 4 = moderate symptom severity with moderate impairment of function                                                            | Liaise with study medical officer     |
| 5 = severe symptom severity                                                                                                   | Liaise with study medical officer.    |

1470

1471 At the regular medical officer appointments (Wks 2, 4, 8, 12) the medical officer will review all side effects  
 1472 from previous reviews, and complete the Adverse Event Log, which includes ratings of AE severity,  
 1473 relationship to study medication, course of action and whether the AE has resolved.

1474

1475 Separate to the clinical reviews, the Researcher will also ask at the 4 weekly research interview a structured  
 1476 checklist of possible side effects, which are based upon previous studies involving cannabinoids. These are  
 1477 not subject to further clinical interpretation as they are confidentially reported to the researcher.

1478

**4.1.2 Definition of Serious Adverse Event**

A Serious Adverse Event (SAE) or Serious Adverse Drug Reaction (Serious ADR) is any untoward medical occurrence that at any dose:

- Fatal or life threatening
- Results in a chronic condition or severe and/or permanent disability
- Results in cancer
- Results in overdose requiring medical attention by ambulance attendants, a doctor or attendance at a hospital
- Results in or prolongs inpatient hospitalisation

Medical and scientific judgment will be exercised in deciding whether other situations should be considered serious such as important medical events that might not be immediately life-threatening or result in death or hospitalisation but might jeopardise the participant or might require intervention to prevent one of the other outcomes listed in the definition above.

**4.1.3 Definition of Suspected Unexpected Serious Adverse Reaction**

A Suspected Unexpected Serious Adverse Reaction (SUSAR) is a SAE for which there is some degree of probability that the event is related to the trial medication, and was not expected to occur with the trial medication (e.g., not listed in product label)

**4.1.4 Assessment of adverse event severity and relationship to treatment**

All Adverse Events are to be recorded on the clinical CRF at each of the weekly medical review and consultation sessions. The clinical CRF has a specific AE table for each week comprising a list of possible side effects arising from Sativex. This data forms one of the main outcome measures for the clinical trial, as we are primarily interested in the safety profile of the drug for the cannabis withdrawal and relapse indications. Any other AE’s that occur that are not listed on the daily AE’s table can be recorded on the relevant days AE table in one of the blank “other” spaces at the bottom of the table. The AE’s table asks the registered nurse to grade the severity of each event using the following definitions:

|                 |                                                                                                                          |
|-----------------|--------------------------------------------------------------------------------------------------------------------------|
| <b>None</b>     | Not experienced at all.                                                                                                  |
| <b>Mild</b>     | Awareness of sign, symptom or event, but easily tolerated                                                                |
| <b>Moderate</b> | Discomfort enough to cause interference with usual activity and may warrant intervention                                 |
| <b>Severe</b>   | Incapacitating with inability to do usual activities or significantly affects clinical status, and warrants intervention |

The project management team have decided that the site MO should be contacted by the RN if any of the AE’s recorded on the daily AE’s table is rated as either Moderate or Severe. In that instance, the participants will be clinically reviewed as soon as possible by the study MO or their nominee, and a decision made as to the likelihood that the AE is a SAE or related to the study medication.

1520 When a participant is discharged from the study, the trial MO must fill out the “Summary of Adverse  
 1521 Events Log” in the back of the participant file, by reviewing the weekly AE tables for the 12 weeks of sativex  
 1522 maintenance treatment, and summarise the AE’s occurrence, severity, start and end dates, whether they  
 1523 were SAE’s and what action was taken. The relationship of any adverse event to the use of the trial  
 1524 medication must also be assessed, based on available information, using the following guidelines:  
 1525

|                         |                                                                                                                            |
|-------------------------|----------------------------------------------------------------------------------------------------------------------------|
| <b>Unlikely related</b> | No temporal association or the cause of the event has been identified, or the drug cannot be implicated                    |
| <b>Possibly related</b> | Temporal association, but other etiologies are likely to be the cause. However, involvement of the drug cannot be excluded |
| <b>Probably related</b> | Temporal association, other etiologies are possible but unlikely                                                           |

1526  
 1527 An adverse event liable to be due to the research is defined as an adverse event whose occurrence  
 1528 cannot be reasonably attributed to a cause independent of the research conditions. The expression 'research  
 1529 conditions' includes all the constraints related to the research or imposed by it, particularly the trial  
 1530 medications (including placebo), the investigations conducted and the conditions under which they are  
 1531 conducted.

1532 **4.1.5 Recording of SAEs, and SUSARs**

1533 When an SAE or SUSAR occurs, CIA and CIF are responsible for reviewing all documentation (e.g.,  
 1534 progress notes, laboratory and diagnostic reports) relative to the event. The investigator will then record all  
 1535 relevant information regarding this event(s) in the participant’s medical records and on the SAE CRF. The  
 1536 onset and end dates, action taken and outcome (e.g., hospitalisation, discontinuation of treatment), severity  
 1537 and relationship to trial medication will be recorded for each adverse event. The severity of the adverse  
 1538 event and relationship to trial medication will be assessed according to specific guidelines listed above.  
 1539 Follow-up laboratory results will be filed with the participant’s source documentation.  
 1540

1541 The investigator will attempt to establish a diagnosis of the event based on signs, symptoms, and/or  
 1542 other clinical information. In the absence of a diagnosis, the individual signs/symptoms will be documented  
 1543 in the participant’s medical records and on the CRF. In addition, all details of any treatment(s) initiated due  
 1544 to the event will be recorded in the medical records and CRF.  
 1545

1546 For all adverse events that require the participant to be discontinued from the trial, relevant clinical  
 1547 assessments and laboratory tests will be repeated at clinically appropriate intervals until final resolution or  
 1548 stabilisation of the event(s).  
 1549  
 1550  
 1551  
 1552  
 1553

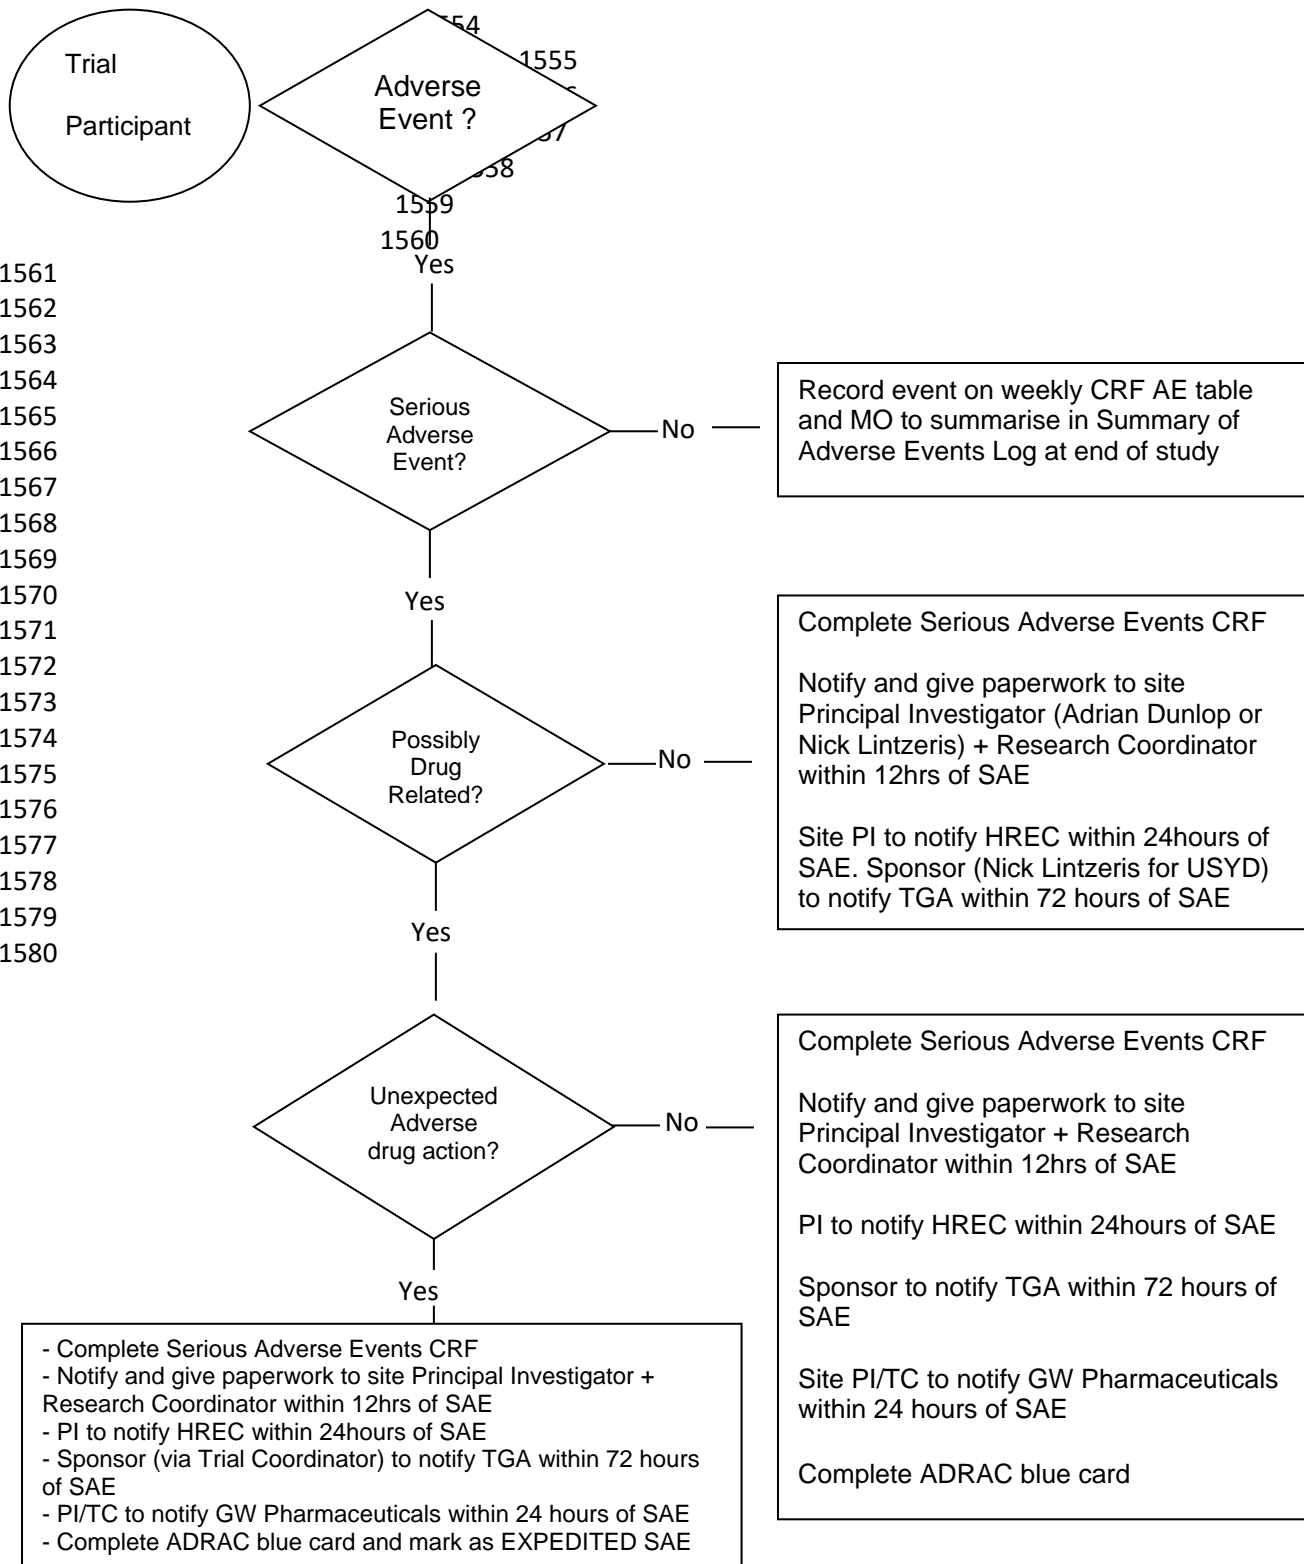

Figure 7. AE, SAE and SUSAR procedural flow chart

1581  
1582  
1583  
1584  
1585  
1586  
1587  
1588



1589  
1590  
1591  
1592  
1593  
1594  
1595

#### 1596 **4.1.6 Reporting of SAEs and SUSARs**

1597 All SAEs must be reported to the on-call physician immediately upon staff being aware of its occurrence.  
1598 SAE require notification of the site investigator, CIA or CIF and Trial Coordinator within 24 hours of the SAE.  
1599 The Trial Coordinator is responsible for notifying the relevant HREC on behalf of the sponsor (USYD) if  
1600 investigator considers the event will impact the research and action is planned as a result (e.g. protocol  
1601 amendment), or if reporting to institution is required as per jurisdictional requirements, or if required under  
1602 conditions of HREC approval. The Trial Coordinator will collate all adverse events data as it occurs and be  
1603 responsible for passing information to the Data and Safety Monitoring Board as an when events are alerted.  
1604 An annual summary of all SAEs will be provided to the HREC with comment by The Trial Coordinator  
1605 regarding action in regard to trial, or if no action is planned.

1606  
1607 All SUSARs will be reported to the relevant HREC with comment by The Trial Coordinator regarding  
1608 planned action, or if no action planned. SUSARs will also be reported to the Therapeutic Goods  
1609 Administration (TGA) in accordance with pharmacovigilance requirements, in line with the GCP guideline as  
1610 adopted by the TGA. After the TGA report has been issued, the sponsor (USYD) must advise CIA of TGA's  
1611 decision and, in turn, CIA (via The Trial Coordinator) must notify relevant HREC.

1612  
1613 Reports of expected adverse reactions, both serious and non-serious will be provided by The Trial  
1614 Coordinator to the sponsor. Expected adverse reactions will be reported to the relevant HREC if the event  
1615 will impact the research and action is planned as a result (e.g., protocol amendment). As a minimum, and as  
1616 required by the *National Statement*, annual reporting to HREC will occur and will detail all adverse events or  
1617 adverse reactions occurring during research approved by those HRECs at any site for which the institution  
1618 conducting the research is responsible.

## 1620 **5 PROTOCOL DEVIATIONS**

1621  
1622 When circumstances arise which suggest that a departure from this protocol should be considered, the  
1623 study MO or their nominee must contact the CIB (Allsop) by telephone as soon as possible prior to  
1624 implementation. Any departure from the agreed protocol will pertain only to the individual participant  
1625 involved. The CRF will describe the circumstances and identify the pertinent protocol procedure.

1626  
1627 In the event that a protocol amendment is proposed for all participants, then the procedure for  
1628 protocol amendment should be followed. In either case, any modification of the protocol that may become  
1629 necessary during the course of this trial, other than to protect participants from an immediate hazard must  
1630 be agreed to by all CIs.

## 1633 **6 STATISTICAL ANALYSES**

### 1634 **6.1 Sample size determination**

1635 Psychotherapy treatment studies for cannabis achieve abstinence rates of 12 to 23% (mean, 20.8%)  
1636 over follow-up periods from 2-6 months,<sup>14</sup> and medication studies are similar (~23.1% abstinence).<sup>8,22</sup> We  
1637 thus base our power analysis on the assumption that the Placebo group will achieve abstinence rates at 12-  
1638 weeks of ~22%. We predict that the addition of Sativex to psychotherapy will double abstinence rates to  
1639 approximately 44%. This estimate is based upon findings from a laboratory relapse model, in which heavy

1640 cannabis users consumed less than half the amount of cannabis (mean 43% less, range 39-48%) following  
1641 repeated doses of nabilone, relative to placebo treatment.<sup>19</sup> With 80% power (two tailed) and  $\alpha=0.05$ , a total  
1642 of 142 participants (71 per group) are needed to detect the predicted benefits in cannabis abstinence.

## 1643 **6.2 Statistical methods**

1644 Chi square and ANOVA will identify any baseline covariates that differ between groups for controlling the  
1645 main analyses. Missing data will be imputed using multiple imputation except for missing urine where  
1646 cannabis use will be assumed to have taken place. All analyses will use Intention-to-treat, which is defined  
1647 here as any person who is randomised to one of the study arms and receives at least one dose of study  
1648 medications. Mixed Models for Repeated Measures (MMRM) will compare groups on changes in outcome  
1649 variables (cannabis use and secondary outcomes) in the medication phase with the multiply imputed  
1650 dataset, assuming that Little's Missing at Random test confirms the data to be missing at random). In addition  
1651 we will perform a sensitivity analysis based on only those with complete data, and compare results to that  
1652 from the MI dataset analysis. Adverse Events will be analysed using chi-square. A Cox proportional hazards  
1653 model will compare retention in treatment between study arms, controlling for potential confounds. The  
1654 impact of the intervention on post-medication outcomes will compare changes in cannabis use outcomes at  
1655 baseline and at follow up between groups using MMRMs. Family-wise error corrections will control for Type  
1656 1 errors where multiple comparisons are performed within a particular analysis where post hoc contrasts are  
1657 performed to further explore interesting (significant) findings.

## 1658 **7 DATA MANAGEMENT**

### 1660 **7.1 Data identification**

1661 All Case Report Forms (CRFs) will use participant and site codes, such that individual patient details  
1662 can not be identified in research records. Original source data from clinical sites (e.g. medical records) must  
1663 necessarily have patient identification labels on them. A researcher at each site will photocopy original  
1664 source data, insert participant identification codes (research study specific numeric code), and remove any  
1665 identifying participant details either by cutting out or blacking out identifiable information.

1666  
1667 The only CRFs that will include identifiable participant details will be the Informed Consent CRFs and  
1668 the *Contact Tracer Forms* (that enable researchers to contact the participants for follow up). These will be  
1669 kept in a separate filing cabinet to the research participant CRF files.

### 1670 **7.2 CRFs and direct access to source data and documents**

1671 Each participant will have a *Participant File* with all relevant CRFs pertinent to their participation in the  
1672 trial. The *Participant File* will be identified by Study Code, indicating their Trial Site, and participant number,  
1673 but no identifiable data will be recorded in the participant's file. Only researchers involved in the trial will  
1674 have direct access to the *Participant Files*. Identifiable data (including participant's name, signed consent  
1675 forms, and *Contact Tracer Form*) will be stored separately by the researchers in locked filing cabinets, and  
1676 will only be accessible to the Trial Coordinator and RAs.

1677  
1678 *The Participant Identification Log* of all those enrolled and randomised onto the trial will be kept in the  
1679 Investigators File at each site, and maintained by the Trial Coordinator. This will include the patient's  
1680 identification and study number.

1681  
1682 The Chief Investigators will permit trial-related monitoring, audits, HREC review, and regulatory  
1683 inspections, providing direct access to source data and documents.

### 1684 **7.3 Databases, data entry and data management procedures**

1685 Trial data will be stored in multiple separate databases which will be linked on an ongoing basis  
1686 throughout the trial and at analysis by CIB Dr David Allsop. Sativex study databases include: (1) Adverse  
1687 Events Database, (2) Cannabis Withdrawal Scale database, (3) Baseline Surveys Database, (4) Clinical Data

1688 database (during maintenance), (5) Discharge Database, (6) One month follow up database, (7) Phone screen  
1689 database.

1690

1691 The Trial Coordinator will be responsible for establishing the study's computerised data bases using  
1692 PASW® software. Each site will have their own individual databases for the study, which local site based staff  
1693 (RA and/or Research Nurse) will update on a regular basis according to the following schedule:

1694

1695 Data for each study participant (including baseline surveys and the clinical data collected during the  
1696 maintenance phase) must be entered at least weekly by site RAs or RNs and transferred electronically to  
1697 Central Trail Database maintained by Dr David Allsop at USYD for cleaning and merging (electronic data  
1698 transfer to USYD must take place within 1 week of each participants previous week of data collection activity  
1699 throughout the maintenance phase of the trial).

1700

1701 This means that the RA/Research Nurse at each site must track each participant's engagement in the  
1702 study and obtain copies of all CRFs collected as close to the day of discharge as possible, or on an ongoing  
1703 basis throughout the trial if logistics permits. Any CRF's that needs to be de-identified should be, before  
1704 being photocopied twice. One copy of the patient's paper CRFs should be transferred to a research file  
1705 (located at one of the four study sites). The RA/Research nurse can then enter data into the site-specific  
1706 database according to the schedule and transfer it to Dr Allsop for central merging and storage. The second  
1707 paper copy of the CRF's should be posted to Dr Allsop to be maintained in the Sponsor data folders at USYD.  
1708 The second paper copy will be used for periodical data monitoring to ensure the face validity of the data in  
1709 the electronic databases.

1710

1711 The first five *Participant Files* from each trial site will be assessed by the Trial Coordinator who will  
1712 assess face validity of the data before data entry.

## 1713 **7.4 Data Monitoring**

1714 The study will be internally monitored by the Trial Coordinator. Errors and queries identified on data  
1715 input and merging will be referred to coordinating staff onsite for correction or comment.

1716

1717 The Data and Safety Monitoring Board will have access to all study data as an unblinded dataset with  
1718 updates every quarter as supplied by CIB.

1719

1720

## 1721 **8 QUALITY CONTROL AND QUALITY ASSURANCE**

1722

1723 The conduct of this study, and the generation, documentation and reporting of data will be conducted  
1724 in compliance with this protocol, the CONSORT statement for the conduct of clinical trials, and the GCP  
1725 guidelines. This trial was registered with the Australian New Zealand Clinical Trials Register (ACTRN - TBA)  
1726 prior to recruitment of the first participant.

### 1727 **8.1 Project Management Team**

1728 The Project Management Team (PMT), consisting of CIs will oversee the conduct of the study, be  
1729 responsible for key decision making for the trial, and ensure that the trial objectives and tasks are being met  
1730 within proposed timelines, and within budget. It is proposed that the PMT will meet at least every three  
1731 months.

### 1732 **8.2 Data Safety and Monitoring Board**

1733 An independent Data Safety and Monitoring Board (DSMB) has been established to review the  
1734 ongoing accumulating data arising from this study. The DSMB consists of an independent clinician, cannabis  
1735 researcher, and biostatistician. The DSMB is primarily responsible for safety monitoring of the trial, involving  
1736 ongoing reviews of any adverse events arising from the administration of Sativex (unblinded data). The  
1737 DSMB will also monitor aspects of study integrity and design should any protocol changes need to be made.

1738  
1739  
1740  
1741  
1742  
1743  
1744  
1745  
  
1746  
1747  
1748  
1749  
1750  
1751  
1752  
1753  
1754  
1755  
1756  
1757  
  
1758  
1759  
1760  
1761  
1762  
1763  
1764  
1765  
1766  
1767  
1768  
1769  
1770  
1771  
1772  
1773  
1774  
1775  
1776  
1777  
1778  
1779  
1780  
1781  
1782  
1783  
1784  
1785  
1786  
1787  
1788  
1789

The Terms of Reference for the DSMB are:

- To advise on potential strategies in addressing problems or difficulties which arise during the conduct of the trial
- To ensure that the project is consistent with national policy and clinical developments in the field
- Data monitoring

It is proposed that the DSMB will meet every quarter

### 8.3 Compliance with trial protocol

The Trial Protocol will be kept in the investigators file at each site, and site investigators will sign to acknowledge they have read and understood these protocols. Standing operating procedures for recruitment and the identification and monitoring of adverse events will be kept in the investigators file. Standard operating procedures (SOP) for interviewing procedures will be kept in the Trial Master File. All researchers conducting interviews will be trained by the Trial Coordinator.

A weekly meeting between clinical staff and researchers will be held to identify new referrals, organise appointments for screening and research interviews, clinical assessments, and relevant investigations. Any issues relating to the day-to-day local management of the trial will be discussed at these meetings and minuted. Copies of these minutes will be kept in the Investigators file.

## 9 ETHICAL CONSIDERATIONS

This study will be conducted in accordance with Australian and international standards of Good Clinical Practice (*The National Health and Medical Research Council's National Statement on Ethical Conduct in Human Research (2007)* and the *Note for Guidance on Good Clinical Practice (CPMP/ICH/135/95) annotated with TGA comments*). Applicable government regulations and Institutional research policies and procedures will also be followed.

This protocol and any amendments will be submitted to the lead HREC at SESLHD for formal approval to conduct the study. The decision of the HRECs concerning the conduct of the study will be made in writing to the investigator.

All participants for this trial will be provided with a *Participant Information Sheet* and two *Consent Forms* describing this study and providing sufficient information for participants to make an informed decision about whether to participate in this study. The *Consent Forms* will be submitted with the protocol for review and approval by the HREC. The formal consent of a participant, using HREC-approved *Consent Forms*, will be obtained before that participant is submitted to any study procedure. The *Consent Forms* must be signed by the participant, and the investigator-designated research professional obtaining the consent.

To ensure sensitive data on drug use and the likes is kept confidential, all research material will be kept in a secure building that is only accessible to authorized persons. All consent forms, instruments and data will be stored in locked filing cabinets and in password protected computer files. Only people directly involved with the project will have access. Participants will be deidentified and assigned codes which will be replicated on instruments. The list of codes will be stored separately to data with identification details. All clinical services are familiar with and comply with NSW Health privacy and confidentiality legislation and procedures. All findings will be disseminated as unidentified study average values with standard deviations and appropriate statistics. No names or code numbers will be reported in any result dissemination. The only instances where confidentiality are likely to be broken are if the participant reports a risk of committing harm to either themselves or to others (e.g. planned suicide, reports of child abuse, illegal activity etc). Under such circumstances the information will be reported to the appropriate authority after alerting the participant to this fact

1790

## 1791 **10 FINANCING AND INSURANCE**

1792 This study is being funded by a 2014 NMHRC Project Grant (#APP1088902). The University of Sydney  
1793 will be the trial sponsor. This is not a commercially sponsored trial.

1794

## 1795 **11 PUBLICATION POLICY**

1796 The trial sponsor, USYD, has no claim over the dissemination of results. GW Pharmaceuticals (UK) are  
1797 providing the drug materials for this trial, and require to see any commercially sensitive findings at least 60  
1798 days prior to submission for publication.

1799

1800 Manuscripts and abstracts will be prepared by all CIs in collaboration with the AIs. Only aggregate data  
1801 will be reported. Results pertaining to individual participants that could be potentially identifying will not be  
1802 reported. Authorship of manuscripts arising will be merit based on the extent of contribution to the paper,  
1803 and agreed upon in "Authorship Meetings" by all CIs.

1804

## 1805 **12 REFERENCES**

1806

- 1807 1. UNODC. *World Drug Report 2013*. United Nations Publication, Sales No. E.13.XI.6;2013.
- 1808 2. AIHW. Alcohol and other drug treatment services in Australia 2010-11: report on the National  
1809 Minimum Data Set. In: Welfare AIoHa, ed. Vol 18. Canberra2012.
- 1810 3. Swift W, Hall W, Teesson M. Cannabis use and dependence among Australian adults: results  
1811 from the National Survey of Mental Health and Wellbeing. *Addiction*. 2001;96(5):737-748.
- 1812 4. Hall W, Degenhardt L. Adverse health effects of non-medical cannabis use. *Lancet*.  
1813 2009;374(9698):1383-1391.
- 1814 5. Roffman R, Stephens R. *Cannabis Dependence: Its Nature, Consequences and Treatment*.  
1815 Cambridge: Cambridge University Press; 2006.
- 1816 6. Shanahan M. *Assessing the economic consequences of two cannabis policy options*: National  
1817 Drug and Alcohol Research Centre, University of New South Wales; 2011.
- 1818 7. Collins D, Lapsley H. The costs of tobacco, alcohol and illicit drug abuse to Australian society  
1819 in 2004–05. In: Ageing DoHa, ed. Canberra2008.
- 1820 8. Allsop DJ, Copeland J, Lintzeris N, et al. Nabiximols as an Agonist Replacement Therapy  
1821 During Cannabis Withdrawal: A Randomized Clinical Trial. *JAMA Psychiatry*.  
1822 2014;71(3):281-291.
- 1823 9. Copeland J, Swift W. Cannabis use disorder: Epidemiology and management. *Int Rev*  
1824 *Psychiatry*. 2009;21(2):96-103.
- 1825 10. Danovitch I, Gorelick DA. State of the art treatments for cannabis dependence. *Psychiatr. Clin.*  
1826 *North Am*. 2012;35(2):309-326.
- 1827 11. Budney AJ, Radonovich KJ, Higgins ST, Wong CJ. Adults seeking treatment for marijuana  
1828 dependence: a comparison with cocaine-dependent treatment seekers. *Exp Clin*  
1829 *Psychopharmacol*. 1998;6(4):419-426.
- 1830 12. Johnston J, Lintzeris N, McGregor I, Allsop DJ, Helliwell D, Winstock A. A double blind,  
1831 randomised, placebo controlled trial of lithium carbonate for the management of cannabis  
1832 withdrawal. Paper presented at: Drug and Alcohol Review2013.
- 1833 13. Vandrey R, Haney M. Pharmacotherapy for cannabis dependence: how close are we? *CNS*  
1834 *Drugs*. 2009;23(7):543-553.
- 1835 14. Copeland J, Clement N, Swift W. Cannabis use, harms and the management of cannabis use  
1836 disorder. *Neuropsychiatry*. 2014;4(1):55-63.
- 1837 15. Carpenter KM, McDowell D, Brooks DJ, Cheng WY, Levin FR. A preliminary trial: double-  
1838 blind comparison of nefazodone, bupropion-SR, and placebo in the treatment of cannabis  
1839 dependence. *Am. J. Addict*. 2009;18(1):53-64.
- 1840 16. Haney M, Hart CL, Vosburg SK, et al. Marijuana withdrawal in humans: effects of oral THC  
1841 or divalproex. *Neuropsychopharmacology*. 2004;29(1):158-170.

- 1842 17. Winstock AR, Lea T, Copeland J. Lithium carbonate in the management of cannabis  
1843 withdrawal in humans: an open-label study. *J. Psychopharmacol. (Oxf)*. 2009;23(1):84-93.
- 1844 18. Haney M, Hart CL, Vosburg SK, Comer SD, Reed SC, Foltin RW. Effects of THC and  
1845 lofexidine in a human laboratory model of marijuana withdrawal and relapse.  
1846 *Psychopharmacology (Berl)*. 2008;197(1):157-168.
- 1847 19. Haney M, Cooper ZD, Bedi G, Vosburg SK, Comer SD, Foltin RW. Nabilone decreases  
1848 marijuana withdrawal and a laboratory measure of marijuana relapse.  
1849 *Neuropsychopharmacology*. 2013.
- 1850 20. Cahill K, Stevens S, Perera R, Lancaster T. Pharmacological interventions for smoking  
1851 cessation: an overview and network meta-analysis. *Cochrane Database Syst Rev*.  
1852 2013;5:Cd009329.
- 1853 21. Mattick RP, Ali R, Lintzeris N. *Pharmacotherapies for the Treatment of Opioid Dependence: Efficacy, Cost Effectiveness and Implementation Guidelines* CRC Press; 2009.
- 1854 22. Levin FR, Mariani JJ, Brooks DJ, Pavlicova M, Cheng W, Nunes EV. Dronabinol for the  
1855 treatment of cannabis dependence: A randomized, double-blind, placebo-controlled trial. *Drug*  
1856 *Alcohol Depend*. 2011;116(1-3):142-150.
- 1857 23. Vandrey R, Stitzer ML, Mintzer MZ, Huestis MA, Murray JA, Lee D. The dose effects of  
1858 short-term dronabinol (oral THC) maintenance in daily cannabis users. *Drug Alcohol Depend*.  
1859 2013;128(1-2):64-70.
- 1860 24. McGilveray IJ. Pharmacokinetics of cannabinoids. *Pain research & management : the journal*  
1861 *of the Canadian Pain Society = journal de la societe canadienne pour le traitement de la*  
1862 *douleur*. 2005;10 Suppl A:15A-22A.
- 1863 25. Ben Amar M. Cannabinoids in medicine: A review of their therapeutic potential. *J.*  
1864 *Ethnopharmacol*. 2006;105(1-2):1-25.
- 1865 26. Karschner EL, Darwin WD, Goodwin RS, Wright S, Huestis MA. Plasma cannabinoid  
1866 pharmacokinetics following controlled oral delta9-tetrahydrocannabinol and oromucosal  
1867 cannabis extract administration. *Clin. Chem*. 2011;57(1):66-75.
- 1868 27. Huestis MA, Sampson AH, Holicky BJ, Henningfield JE, Cone EJ. Characterization of the  
1869 absorption phase of marijuana smoking. *Clin. Pharmacol. Ther*. 1992;52(1):31-41.
- 1870 28. Karst M, Wippermann S, Ahrens J. Role of cannabinoids in the treatment of pain and (painful)  
1871 spasticity. *Drugs*. 2010;70(18):2409-2438.
- 1872 29. Campos AC, Moreira FA, Gomes FV, Del Bel EA, Guimaraes FS. Multiple mechanisms  
1873 involved in the large-spectrum therapeutic potential of cannabidiol in psychiatric disorders.  
1874 *Philos. Trans. R. Soc. Lond. B. Biol. Sci*. 2012;367(1607):3364-3378.
- 1875 30. Demirakca T, Sartorius A, Ende G, et al. Diminished gray matter in the hippocampus of  
1876 cannabis users: possible protective effects of cannabidiol. *Drug Alcohol Depend*. 2011;114(2-  
1877 3):242-245.
- 1878 31. Morgan CJ, Schafer G, Freeman TP, Curran HV. Impact of cannabidiol on the acute memory  
1879 and psychotomimetic effects of smoked cannabis: naturalistic study: naturalistic study  
1880 [corrected]. *Br. J. Psychiatry*. 2010;197(4):285-290.
- 1881 32. Allsop DJ, Norberg MM, Copeland J, Fu S, Budney AJ. The cannabis withdrawal scale  
1882 development: patterns and predictors of cannabis withdrawal and distress. *Drug Alcohol*  
1883 *Depend*. 2011;119:123-129.
- 1884 33. Swift W, Wong A, Li K, Arnold J, McGregor I. Analysis of cannabis seizures in NSW,  
1885 Australia: Cannabis potency and cannabinoid profile. *PLoS One*. 2013;Jul 24;8(7):e70052.
- 1886 34. Russo E, Guy GW. A tale of two cannabinoids: the therapeutic rationale for combining  
1887 tetrahydrocannabinol and cannabidiol. *Med. Hypotheses*. 2006;66(2):234-246.
- 1888 35. DoH. Australian Public Assessment Report for Nabiximols. In: Administration TG, ed.  
1889 Canberra: Australian Government Department of health; 2013.
- 1890 36. Wade D. Evaluation of the safety and tolerability profile of Sativex: is it reassuring enough?  
1891 *Expert Rev Neurother*. 2012;12(4 Suppl):9-14.
- 1892 37. Schoedel KA, Chen N, Hilliard A, et al. A randomized, double-blind, placebo-controlled,  
1893 crossover study to evaluate the subjective abuse potential and cognitive effects of nabiximols  
1894

- 1895 oromucosal spray in subjects with a history of recreational cannabis use. *Hum*  
1896 *Psychopharmacol.* 2011;26(3):224-236.
- 1897 38. Bruno R, Allsop DJ, Copeland J, et al. The impact of sativex on cognitive function during  
1898 treatment for cannabis withdrawal. Paper presented at: Drug and Alcohol Review2013.
- 1899 39. Norberg MM, Mackenzie J, Copeland J. Quantifying cannabis use with the Timeline  
1900 Followback approach: A psychometric evaluation. *Drug Alcohol Depend.* 2012;121(3):247-  
1901 252.
- 1902 40. Mattick RP, Larance B, Bruno R, et al. Minimizing the unintended consequences of opioid  
1903 treatment: development of a drug behavior scale for use in Australia. Paper presented at:  
1904 College on Problems of Drug Dependence2012; Palm Spings, USA.
- 1905 41. FDA. Assessment of Abuse Potential of Drugs In: (CDER) CfDEaR, ed: Food and Drug  
1906 Administration, US Department of Health and Human Services; 2010.
- 1907 42. Brazier JE, Roberts J. The estimation of a preference-based measure of health from the SF-12.  
1908 *Med. Care.* 2004;42(9):851-859.
- 1909 43. Drummond C, Coulton S, James D, et al. Effectiveness and cost-effectiveness of a stepped care  
1910 intervention for alcohol use disorders in primary care: pilot study. *Br. J. Psychiatry.*  
1911 2009;195(5):448-456.
- 1912 44. Rolling K. Counting the costs of crime in Australia: a 2005 update. In: Criminology AIo, ed.  
1913 Canberra2008.
- 1914 45. Organisation WH. *World Health Organization Health and Performance Questionnaire (HPQ):*  
1915 *Clinical Trials Baseline Version.* 2002.
- 1916 46. Ware JE, Jr., Sherbourne CD. The MOS 36-item short-form health survey (SF-36). I.  
1917 Conceptual framework and item selection. *Med. Care.* 1992;30(6):473-483.
- 1918 47. Lovibond SH, Lovibond PF. Manual for the Depression Anxiety Stress Scales. Sydney:  
1919 Psychology Foundation; 1995.
- 1920 48. Darke S, Hall W, Wodak A, Heather N, Ward J. Development and validation of a multi-  
1921 dimensional instrument for assessing outcome of treatment among opiate users: the Opiate  
1922 Treatment Index. *Br. J. Addict.* 1992;87(5):733-742.
- 1923 49. Frewen AR, Baillie AJ, Montebello ME. Are cannabis users who participate in a randomized  
1924 clinical trial different from other treatment seekers? *J. Subst. Abuse Treat.* 2009;36(3):339-344.
- 1925 50. Gossop M, Darke S, Griffiths P, et al. The Severity of Dependence Scale (SDS): psychometric  
1926 properties of the SDS in English and Australian samples of heroin, cocaine and amphetamine  
1927 users. *Addiction.* 1995;90:607-614.
- 1928 51. Martin G, Copeland J, Gates P, Gilmour S. The Severity of Dependence Scale (SDS) in an  
1929 adolescent population of cannabis users: Reliability, validity and diagnostic cut-off. *Drug*  
1930 *Alcohol Depend.* 2006;83(1):90-93.
- 1931 52. Copeland J, Swift W, Roffman R, Stephens R. A randomized controlled trial of brief cognitive-  
1932 behavioral interventions for cannabis use disorder. *J. Subst. Abuse Treat.* 2001;21:55-64.
- 1933 53. Ryan A, Holmes J, Hunt V, et al. Validation and implementation of the Australian Treatment  
1934 Outcomes Profile in specialist drug and alcohol settings. *Drug Alcohol Rev.* 2014;33(1):33-42.
- 1935 54. Grant I, Gonzalez R, Carey CL, Natarajan L, Wolfson T. Non-acute (residual) neurocognitive  
1936 effects of cannabis use: a meta-analytic study. *J. Int. Neuropsychol. Soc.* 2003;9(5):679-689.
- 1937 55. Huestis MA, Mitchell JM, Cone EJ. Detection times of marijuana metabolites in urine by  
1938 immunoassay and GC-MS. *J Anal Toxicol.* 1995;19:443-449.
- 1939





**Appendix B. Generic Trial Prescription**

**Clinical Trial site: Langton Centre**  
SESLHD Drug and Alcohol Services  
591 South Dowling Street, Surry Hills NSW

**Medication Order Form**

**RCT of cannabinoid replacement therapy (Sativex®) for the management of treatment-resistant cannabis dependence**

**Protocol number:** 1.3

**Ethics Number:** HREC ref no: 14/289 (HREC/14/POWH/701)

**Investigational drug: Nabiximols (Sativex® oromucosal spray)**

(Each 100 microlitre spray contains: 2.7 mg THC and 2.5 mg CBD and up to 0.04 g alcohol.)

Patient's name: \_\_\_\_\_

MRN: \_\_\_\_\_ DOB \_\_\_\_\_

Address: \_\_\_\_\_

Subject ID: \_\_\_\_\_

Week Number: \_\_\_\_\_ Arm Number (if applicable): \_\_\_\_\_

**Nabiximols spray or Placebo spray**

Instruction: \_\_\_\_\_

Quantity supplied: \_\_\_\_\_

Investigator(s): **Professor Nicholas Lintzeris** Prescriber name: \_\_\_\_\_

Prescriber number: \_\_\_\_\_ Signature: \_\_\_\_\_

Pharmacist 1 name: \_\_\_\_\_ Pharmacist 2 name: \_\_\_\_\_

Signature: \_\_\_\_\_ Signature: \_\_\_\_\_

Affix dispensing labels here below (pharmacists to sign and date across label)



1979 **Appendix D. NCPIC 6 Session counselling manual**

1980

1981

1982

1983 Refer to attached Appendix D document.

1984

1985

1986  
1987  
1988  
1989  
1990  
1991  
1992  
1993  
1994  
1995  
1996

**Appendix E. Cognitive testing tasks**

**Task descriptions**

These measures all require simple motor responses for their execution (e.g. pressing a touch pad or computer screen in response to a stimulus). The tasks are all simple to complete, and have been designed so that very elderly or very cognitively impaired individuals can understand and complete the tasks. There is no identifying information required for their completion (names etc) and existing protocol sequence identification numbers will be used in all instances for attributing data to each participant, as per those used in the approved protocol. The batteries are largely automated, and a standardised ‘script’ for participant instructions (explaining how to complete each task) will be provided. No specific skills in cognitive assessment are required to administer these tests.

|                                                                                     |                                                                                                                                                                                                                                                                                                                                                                                                                                                                                                                                                                                                                                                                                                                                                                                                                                                                                                                                                                           |
|-------------------------------------------------------------------------------------|---------------------------------------------------------------------------------------------------------------------------------------------------------------------------------------------------------------------------------------------------------------------------------------------------------------------------------------------------------------------------------------------------------------------------------------------------------------------------------------------------------------------------------------------------------------------------------------------------------------------------------------------------------------------------------------------------------------------------------------------------------------------------------------------------------------------------------------------------------------------------------------------------------------------------------------------------------------------------|
| 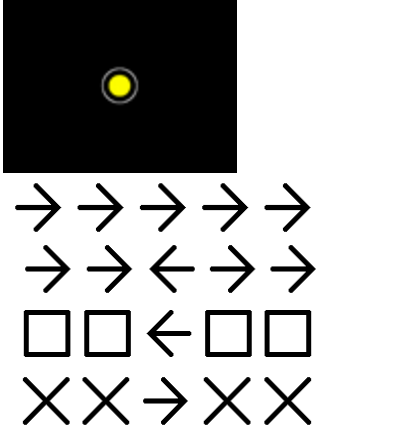   | <p><b>Flankers Task. This test assesses both choice reaction time and the ability to ignore distracting but irrelevant information.</b></p> <p>Sets of five symbols appear on the screen one set at a time. The central symbol (target) is always an arrow, pointing either to the right or the left. The other four symbols (flankers) are either congruent (arrows pointing in the same direction as the target); incongruent (arrows pointing in the opposite direction to the target); neutral (squares); or suppressors (crosses).</p> <p>The task is to press a left or right button corresponding to the direction of the central target arrow as quickly as possible, unless the flankers are crosses, in which case no response should be made. The mean time for correct responses and the number of errors are recorded for each of the three congruence conditions, as well as the number of false positive responses to the suppressor (NoGo) condition.</p> |
|  | <p><b><u>Digit-Symbol Substitution Task</u></b></p> <p>This is a basic test of speed of information processing.</p> <p>A key is displayed at the top of the screen, matching nine symbols with the digits 1 — 9. Symbols appear in the box below, and the testee responds by tapping on the numeric button corresponding to the digit as quickly as possible. The number of correct and incorrect responses and the mean response time for correct responses is recorded.</p>                                                                                                                                                                                                                                                                                                                                                                                                                                                                                             |
|                                                                                     | <p><b>Rapid Visual Information Processing (RVP)</b> This test assesses how well a person can stay alert during cognitively demanding tasks.</p> <p>A series of digits appears one at a time on the screen. The digits appear every 600 msec, that is 100/minute. The task is to respond whenever there are three even digits in a row OR three odd digits in a row. The number of correct responses (more suggests better attention), the number of false positives, and the reaction time for correct responses (faster suggests better performance) are recorded.</p>                                                                                                                                                                                                                                                                                                                                                                                                   |
|                                                                                     | <p><b>Rapid Visual Information Processing (RVP)</b> This test assesses how well a person can stay alert during cognitively demanding tasks.</p>                                                                                                                                                                                                                                                                                                                                                                                                                                                                                                                                                                                                                                                                                                                                                                                                                           |

|                                                                                   |                                                                                                                                                                                                                                                                                                                                                                                                                                                                                                                                                                                                                                                                                                                                                                                                                                                                                                                                                                                                                                                                                                                                                                                                                                                                                                                                                          |
|-----------------------------------------------------------------------------------|----------------------------------------------------------------------------------------------------------------------------------------------------------------------------------------------------------------------------------------------------------------------------------------------------------------------------------------------------------------------------------------------------------------------------------------------------------------------------------------------------------------------------------------------------------------------------------------------------------------------------------------------------------------------------------------------------------------------------------------------------------------------------------------------------------------------------------------------------------------------------------------------------------------------------------------------------------------------------------------------------------------------------------------------------------------------------------------------------------------------------------------------------------------------------------------------------------------------------------------------------------------------------------------------------------------------------------------------------------|
|                                                                                   | <p>A series of digits appears one at a time on the screen. The digits appear every 600 msec, that is 100/minute. The task is to respond whenever there are three even digits in a row OR three odd digits in a row. The number of correct responses (more suggests better attention), the number of false positives, and the reaction time for correct responses (faster suggests better performance) are recorded</p>                                                                                                                                                                                                                                                                                                                                                                                                                                                                                                                                                                                                                                                                                                                                                                                                                                                                                                                                   |
|  | <p><b><i>Stop signal task (SST)</i></b> This test assesses how well an individual is able to suddenly stop a response when situations change. This has direct relevance to driving as when road hazards randomly emerge, a rapid response is required.</p> <p>Participants are presented with a stimulus and are required to press a corresponding key as fast as possible (e.g., left button key press with the presentation of a left arrow). On a minority of trials, a ‘stop’ signal (a loud ‘beep’) is presented soon after the stimulus onset (starting between 100 and 500 milliseconds), whereby participants are required to withhold their response to the stimuli. The delay time at which participants can reliably inhibit their responses (‘stop’ reaction time) is determined using an iterative staircase procedure, where the time between stimuli presentation and the stop signal is steadily reduced (i.e. the task made more difficult) until participants start to make errors, and the task is then made easier: this process repeats for 320 trials in order to make an accurate assessment of ‘stop’ reaction time. Shorter ‘stop’ reaction times suggests that participants are more quickly able to adapt to changing situations, and suggests better performance. This task takes approximately 6-8 minutes to complete.</p> |
|                                                                                   | <p><b>N-Back</b><br/>This is a test of verbal working memory, and is dependent on the integration of the frontal and temporal regions, two areas particularly affected by THC.</p> <p>Participants are presented with a series of letters on screen, one at a time at the rate of 15 stimuli per 20 seconds. There are three levels of difficulty of the task: in the 1-back condition, participants are asked to respond when the letter presented is the same as the one previously presented; in the 2-back condition, participants are asked to respond then the letter presented is the same as the one presented two letters prior; and the 3-back condition requires participants to respond when the letter presented is the same as the one presented three letters prior. Reaction time to targets (faster suggests better performance) and number of trials correctly identified (more suggests better working memory) are recorded for each level of difficulty.</p>                                                                                                                                                                                                                                                                                                                                                                         |
|                                                                                   | <p><b>Ray Auditory Verbal Learning Task</b><br/>This is the classic test of verbal learning and memory.</p> <p>In this task, participants are read a list of 15 words at the rate of one per second, and, when the list has been read, to say as</p>                                                                                                                                                                                                                                                                                                                                                                                                                                                                                                                                                                                                                                                                                                                                                                                                                                                                                                                                                                                                                                                                                                     |

|  |                                                                                                                                                                                                                                                                                                                                                                                                                                                                                                                                                                                                                                                                                                                                                                                                                      |
|--|----------------------------------------------------------------------------------------------------------------------------------------------------------------------------------------------------------------------------------------------------------------------------------------------------------------------------------------------------------------------------------------------------------------------------------------------------------------------------------------------------------------------------------------------------------------------------------------------------------------------------------------------------------------------------------------------------------------------------------------------------------------------------------------------------------------------|
|  | <p>many words as they can remember. The list is read again, and participants again asked to report as many words as they can remember. This process is repeated for 5 presentations of the word list. This allows the assessment of initial memory (immediate memory recall) and learning (improvement over trials). A distractor list of 15 words is then presented for recall; after which the participant is requested to recall the initial list, which examines the degree of interference from new learning and robustness of memory trace. Finally, 20 minutes after the initial learning, the participant is asked to spontaneously recall as many words from the list as possible, as well as identify the targets in a presented sequence of words, which assesses both recall and recognition memory.</p> |
|--|----------------------------------------------------------------------------------------------------------------------------------------------------------------------------------------------------------------------------------------------------------------------------------------------------------------------------------------------------------------------------------------------------------------------------------------------------------------------------------------------------------------------------------------------------------------------------------------------------------------------------------------------------------------------------------------------------------------------------------------------------------------------------------------------------------------------|

1997  
1998  
1999

1  
2  
3  
4  
5  
6  
7  
8  
9  
10  
11  
12  
13  
14  
15  
16  
17  
18  
19  
20  
21  
22  
23

**A randomised placebo-controlled trial of nabiximols for  
the treatment of cannabis dependence.**

Statistical Plan

**Table of Contents**

24

25

26 Section 1: Baseline Characteristics ..... 3

27 Section 2: Treatment Characteristics ..... 3

28 Section 3: Primary Analysis ..... 4

29 Section 4: Secondary Analyses ..... 5

30 Section 5: Safety ..... 6

31 Section 6: Satisfaction with Medication ..... 6

32 Section 7: Effectiveness of Blinding ..... 6

33 Section 8: Urinalysis ..... 6

34

35



## 36 **A Note on Data Sets Analysed**

37 For all analyses the primary *predictor* was treatment group (nabiximols vs placebo). The core analyses  
 38 for this study were performed on a non-imputed modified intention-to-treat basis, i.e. on all valid data  
 39 from participants who were allocated to a treatment arm and received one or more doses of either  
 40 nabiximols or placebo. Identical analyses were performed on two alternate datasets: (1) a per-protocol  
 41 dataset comprising only the participants who finished treatment, (2) a dataset imputed using  
 42 Longitudinal Multiple Imputation (as outlined in Chapter 9 of *Flexible Imputation of Missing Data*; van  
 43 Buuren, 2012). Sensitivity analyses, comparing results from the core intention-to-treat analyses to those  
 44 from the alternate datasets, were performed and are reported in brief in the main manuscript but in detail  
 45 in the supplementary materials.

## 46 **Section 1: Baseline Characteristics**

47 Summary statistics (frequency for categorical variables, mean and standard deviation for continuous  
 48 variables) were calculated for both groups and across the entire sample. To test for pre-existing site  
 49 differences in relevant biohistorical variables that might bias results, separate regressions, with  
 50 study site as the sole predictor, were performed on outcomes: (1) participant age, (2) gender, (3)  
 51 frequency of cannabis use prior to study commencement, (4) quantity of cannabis use prior to study  
 52 commencement, (5) ICD-10 cannabis dependence score, (6) age of first cannabis use, and (7)  
 53 duration of regular cannabis.  
 54  
 55

## 56 **Section 2: Treatment Characteristics**

57 The purpose of these analyses was to test for between-group differences in variables that could potentially  
 58 confound the primary analysis: (i) retention in treatment, (ii) dose of medication, and (iii) number of  
 59 counselling sessions.

### 60 **2.1 Retention in Treatment**

61 For the purposes of this analysis only, a participant was considered to have exited the study if they ceased  
 62 collecting medication.  
 63

64 Some participants informed staff of their intention to cease receiving medication or to leave the study. For  
 65 these participants there was a precise exit day. However, many participants simply stopped attending the  
 66 study without notifying staff, and were unable to be contacted. Because participants were given a week's  
 67 worth of nabiximols/placebo medication at the start of each week it was not possible to know how many of  
 68 each week's dose these participants consumed. Thus the problem for any survival analyses is that there is no  
 69 way to know exactly what day participants 'exited' the study (i.e. the first day they did not take their  
 70 medication).  
 71

72 In light of these difficulties a formal decision rule was adopted whereby a participant was considered to have  
 73 remained in treatment until the last known day of prescribed and dispensed nabiximols/placebo medication.  
 74 .  
 75

76 **Analysis:** Between-group difference in time in treatment was analysed using a Cox's proportional  
 77 hazards regression and a Kaplan-Meier plot, including median treatment retention for each group.  
 78

### 79 **2.2 Dose of Medication**

80  
 81 Daily number of sprays, averaged across the maintenance phase (Weeks 2 to 12) was regressed on treatment  
 82 group. Week 1 was omitted from calculation of this 'average sprays per day' score as participants were still  
 83 adjusting their dose.  
 84  
 85

86

### 87 **2.3 Counselling Sessions**

88 Choice of the final model used to analyse the effect of treatment group on incidence rate ratio of number of  
89 counselling sessions was based on three assessments: (i) comparison of mean number of sessions to standard  
90 deviation of number of sessions to assess presence or absence of over- or under-dispersion, (ii) obtaining a  
91 dispersion statistic ( $\alpha$ ), (iii) comparison of models using Vuong's non-nested test (Vuong, 1989). These  
92 assessments determined whether Poisson or negative binomial regression was more appropriate.

93

## 94 **Section 3: Primary Analysis: Frequency of Illicit Cannabis Use in Days Across** 95 **the 12-Week Trial**

96

### 97 **3.1 Rationale for Primary Outcome Measure**

98 There are many ways to measure drug dependence but the most readily quantifiable is drug use, and the most  
99 reliable measure of drug use is number of days used. Thus any treatment claiming to reduce dependence on  
100 cannabis should be associated with a reduction in number of days of cannabis use if it is to be considered  
101 truly effective. We hypothesised that if nabiximols was truly capable of reducing illicit cannabis, its use  
102 should lead to a significant reduction in the total number of days participants used illicit cannabis over the  
103 course of the 12-week trial. Thus total number of cannabis use days over the 12-week trial was the primary  
104 outcome measure for the study. This outcome was a continuous variable, calculated by summing self-  
105 reported number of days used in the previous 4 weeks across research interviews at weeks 4, 18, and 12,  
106 yielding a single score out of 84 (12 x 7 days) for each participant still participating at 12 weeks who  
107 completed all three research interviews.

108

### 109 **3.2 Presentation of Summary Data**

110 A box and whisker plot will be used to display the distribution of 84-day cannabis use scores for each group.  
111 Group mean scores for each group will be calculated and displayed on the same box plot.

112

113 Conducting a multi-site study affords the opportunity to test the generalisability of a treatment by examining  
114 its influence within and across each of the study locations. A table will present number of participants at  
115 baseline, number of participants who completed all three research interviews, and mean 84-day cannabis use  
116 score within each group at each of the four study sites (The Langton Centre, St George Hospital, Western  
117 Sydney Centre for Addiction Medicine, and Newcastle Community Health Services) and within each group  
118 averaged across all sites.

119

### 120 **3.3 Inferential Analysis**

121 The primary analysis was an ANCOVA, with total days of illicit cannabis use across the 12-Week trial as the  
122 outcome and predictors (1) Treatment (two-level factor: Placebo vs Nabiximols), (2) Site (four-level factor:  
123 Langton Centre, St. George Hospital, Western Sydney, Newcastle), (3) Treatment x Site interaction, and (4)  
124 mean-centered days used in the previous 4-weeks at baseline.

125

126 In the event of significant omnibus effects for Treatment, Site, or the Treatment x Site interaction, estimates  
127 of the difference in average days used between levels of factors, and the corresponding 95% confidence  
128 intervals, were obtained by comparing covariate-adjusted means, with *P*-values adjusted for multiple  
129 comparisons using the Benjamini-Hochberg procedure for controlling the false discovery rate.

130

131 In order to establish the robustness of the observed treatment effect, the primary analysis was also performed  
132 on the two alternative datasets (Per-Protocol, and Multilevel Multiply Imputed). These results are briefly  
133 reported in the main manuscript, and in more detail in supplementary materials.

134

135

136

### 137 **3.3 Assumption Testing and Post-Hoc Tests**

138 Frequency of use data in drug dependent populations is often not distributed normally. Fortunately the  
 139 normality of distribution assumption in regression and ANOVA applies to model residuals, not the outcome  
 140 variable itself. However, for the primary analysis it was important to check this assumption was upheld via  
 141 visual inspection of model residuals for normality using Quantile-Quantile (Q-Q) plots<sup>35</sup> and histograms.  
 142 Our rule for how the outcome of the inspection of residual plots would determine reporting of results was as  
 143 follows: (1) If model residuals were distributed sufficiently close to normal, the results of the regression  
 144 would be reported, (2) If deemed not sufficiently close to normal, a non-parametric Wilcoxon-Mann-  
 145 Whitney rank sum test – testing the null hypothesis that the distributions of the Placebo group and  
 146 Nabiximols group do not differ in location – would be performed, (3) If there are doubts about whether the  
 147 departure from normality constituted a violation of the assumptions of ANOVA, results of both the  
 148 parametric regression and non-parametric Wilcoxon Mann-Whitney tests would be reported.

149

## 150 **Section 4: Secondary Analyses**

151

### 152 **4.1 Abstinence and 50% Reduction in Use**

153

154 In order to test whether nabiximols affected participants' odds of remaining totally abstinent, a dichotomous  
 155 abstinence variable was calculated. If participants reported in *any* of the three post-baseline research  
 156 interviews (weeks 4, 8, and 12) that they were completely abstinent for the previous 4 weeks they were  
 157 coded as '1'. If participants reported no 4-week periods of total abstinence they were coded '0'. Numbers  
 158 and proportions of people meeting this criterion are reported. A logistic regression was performed,  
 159 regressing this dichotomous 'any abstinence' variable on treatment group. A second (less stringent) binary  
 160 variable was calculated, indicating whether participants had reduced the number of days they had consumed  
 161 cannabis in the previous 4 weeks by 50% or more from baseline to weeks 9-12 (measured at the week 12  
 162 research interview). A logistic regression tested for group differences in the odds of reducing days used by  
 163 50% or more from baseline to week 12.

164

### 165 **4.2 Longitudinal Analyses of Secondary Outcomes**

166 The fact that the same battery of questionnaires was administered at four equidistant time points across the  
 167 12-week trial [0 weeks (baseline), 4 weeks, 8 weeks, and 12 weeks] meant that we could observe the *change*  
 168 in several important variables during the course of the 12-week trial period. Factorial, random-intercepts  
 169 mixed models for repeated measures regression (MMRM) testing for between-group differences in change in  
 170 outcome relative to baseline over the course of the 12-week trial were performed for several outcome  
 171 variables, including scores on: (1) the Cannabis Withdrawal Symptom (CWS) questionnaire, (2) the  
 172 Marijuana Craving Questionnaire (MCQ) (3) the Cannabis Problems Questionnaire (CPQ), (3) the  
 173 Fagerstrom test for Nicotine Dependence, (4) the Alcohol Use Disorders Identification Test (AUDIT), (5) all  
 174 factors of the Short-Form 36 Quality of Life scale (SF-36) and (6) the OTI drug-related crime scale. The  
 175 fixed effects in these models were Treatment group (placebo vs nabiximols; a level-2 factor), and Time (0  
 176 weeks [baseline], 4 weeks, 8 weeks and 12 weeks; a level-1 factor). Participant ID was the random effect. A  
 177 block diagonal covariance structure was used to model the within-person error. Maximum likelihood  
 178 estimates of change in group difference at each time point relative to baseline were obtained, as well as 95%  
 179 confidence intervals for these estimates. Omnibus tests for main effects of Treatment, main effects of Time,  
 180 and Treatment x Time interaction were also obtained (Type-3 *F*-tests for continuous variables and Type-3  
 181 Wald Chi-square tests for categorical [only OTI crime]) for each MMRM. The *P*-values for these omnibus  
 182 tests (three tests per variable and 13 variables = 39 tests in total) were corrected using the Benjamini-  
 183 Hochberg method for controlling the false discovery rate.

184



## 186 **Section 5: Safety**

### 187 **5.1 Adverse events**

188 Adverse events (AEs) were assessed and addressed during clinical assessments with the study medical  
189 officer (SMO) at 4-weekly appointments. At the end of study participation, the SMO recorded the severity of  
190 each AE (mild, moderate, severe), the outcome (ongoing or resolved, with or without treatment), and  
191 attribution to study medication.

192

193 **Analysis:** If AE was attributed to study medication then:

194 (a) Numbers of recorded incidents of each of the different AE categories will be reported for each  
195 experimental group.

196 (b) For the purposes of the inferential analysis AEs were collapsed into a single count variable  
197 (i.e. irrespective of type or severity) representing total number of AEs experienced by each  
198 participant over the course of the entire 12-week trial period. After examining dispersion, a  
199 negative binomial regression was conducted, testing between-group differences in the  
200 incidence rate ratios of AEs.

201

### 202 **5.2: Abuse Liability: Aberrant Medication Behaviours**

203 **Analysis:** Aberrant medication behaviors were measured by the modified ORBIT questionnaire at  
204 Week 12. Total number of different types of adverse events in each treatment group over the course  
205 of the 12-week trial were calculated. A chi-squared test of independence was performed, testing for  
206 presence of a between-group difference in proportion of individuals who engaged in *at least one*  
207 aberrant behaviour during the 12-week trial.

## 208 **Section 6: Satisfaction with Medication**

209 **Analysis:** At the final three research interviews (weeks 4, 8, and 12) participants were asked whether they  
210 would recommend their medication to friend seeking treatment (Yes/No response). Participants' last  
211 response to this variable (i.e. at last research interview before exiting the study early or at week-12  
212 interview) was the response analysed. Numbers and proportions in each group who indicated they would  
213 recommend their medication to a friend was calculated. A logistic regression was performed, regressing this  
214 dichotomous 'would not recommend vs would recommend' variable on treatment group.

215

## 216 **Section 7: Effectiveness of Blinding**

217 At each follow-up research interview (Weeks 4, 8, and 12) participants were asked to guess what treatment  
218 arm (Placebo or Nabiximols), they had been allocated to. A binary variable was obtained for each  
219 participant (Guessed Placebo vs Guessed Nabiximols) such that whatever participants guessed in their last  
220 research interview before either exiting early or completing the study, was counted as their guess for the  
221 study. This guess was compared to their actual allocated treatment group and coded as either incorrect or  
222 correct. A logistic regression was performed, regressing this binary 'guessed incorrect vs guessed correct'  
223 variable on treatment group. Odds ratios, *P*-values, and 95% confidence intervals are reported for this  
224 analysis.

225

226

227

## 228 **Section 8: Urinalysis**

229 **Analysis: Testing the Ability of Self-Reported Days Use to Predict Urinary Cannabinoid**  
230 **Concentration.** Urine samples taken at baseline, week 4, week 8, and week 12 were analysed for (-)-*trans*-  
231  $\Delta^9$ -tetrahydrocannabinol (THC), 11-Hydroxy- $\Delta^9$ -tetrahydrocannabinol (11-OH-THC), and 11-Nor-9-  
232 carboxy-9-tetrahydrocannabinol (THC-COOH). Each cannabinoid was adjusted according to creatinine  
233 concentration at the time of measurement using the procedure outlined in Baker and colleagues (2018).  
234 Analysis of urine drug tests results was conducted to examine the validity of self-reported illicit cannabis use  
235 at baseline and week 4, 8 and 12 research interviews, and was therefore be restricted to the Placebo group  
236 (the prescribed THC in the Nabiximols group prevents meaningful interpretation of urinary THC or  
237 metabolites). Two approaches were taken to the analysis of urinary cannabinoids.

238  
239 **Method 1:** This method was a more general test; of whether self-reported days use predicted levels of the  
240 three metabolites. Creatinine adjusted urinary THC, 11-OH THC and THC-COOH levels from urine samples  
241 from all observations time points from all Placebo participants was compared against self-reported days  
242 illicit cannabis use collected on the same day at 4-weekly research interviews. Due to the very large range  
243 and heavy positive skew usually observed in this data, creatinine-adjusted cannabinoid concentrations were  
244 Winsorized and then log-transformed prior to analysis. The log-levels of the three cannabis metabolites were  
245 then regressed on self-reported days use of illicit cannabis in the previous 4 weeks, with participant age and  
246 gender entered as covariates. These regressions were performed on data from each of the four measurement  
247 points in isolation (baseline, 4 weeks, 8 weeks, and 12 weeks).

248  
249 **Method 2:** This approach attempted to verify self-reported cannabis use on a case-by-case basis, via the  
250 method described by Baker and colleagues (2018) for assigning recent abstinence from illicit cannabis use  
251 based on quantitative creatinine adjusted THC-COOH levels. Change scores were calculated for the THC-  
252 COOH variable by dividing Winsorized THC-COOH levels at each time point by Winsorized THC-COOH  
253 levels for the same participant at the previous time point (hence there will be no change scores for baseline  
254 observations, which will not be included in analysis). A binary variable was then calculated based on these  
255 change scores. Observations were recorded as abstinence from recent use (negative or '0') if THC-COOH  
256 levels dropped by more than 75% from the previous observation or if THC-COOH observations fell below  
257 200 ng/ml. Any observations that did not meet this criterion were recorded as a positive ('1'), signifying  
258 recent illicit cannabis use.

259 A binary cannabis use variable was also calculated, where any number of days use was recorded as a  
260 positive ('1') and zero days use a negative (0). A contingency table was then calculated using these two  
261 binary variables. These analyses verified use or abstinence at the observation level. As we were not  
262 concerned with trajectory of either cannabis use or THC-COOH levels, time was not included as a factor in  
263 these models.

264 Baker and colleagues also considered 50 ng/ml and 100 ng/ml as cutoff criteria and these were also assessed.  
265 ROC analysis was performed using the three cutoff criteria (50 ng/ml, 100 ng/ml, and 200 ng/ml) in  
266 combination with the  $\geq 75\%$  reduction criterion. Sensitivity, specificity, percentage correctly classified,  
267 positive- and negative-likelihood ratios, and area under the curve statistics from these analyses are reported.

268
