# Supplementary material
Source: PubMed Central journal article supplement (PMC6632121)
Supplement: jamainternmed-179-1242-s003.pdf [file jamainternmed-179-1242-s003.pdf]

# Data Sharing Statement

Lintzeris. Nabiximols for the Treatment of Cannabis Dependence.  
*JAMA Intern Med.* Published July 15, 2019.  
10.1001/jamainternmed.2019.1993

## Data

**Data available:** Yes

**Data types:** Deidentified participant data

**How to access data:** Request access to data from  
[Nicholas.lintzeris@health.nsw.gov.au](mailto:Nicholas.lintzeris@health.nsw.gov.au)

**When available:** With publication

## Supporting Documents

**Document types:** None

## Additional Information

**Who can access the data:** Researchers whose proposed use of the data has been approved

**Types of analyses:** For meta-analysis and reviews of literature

**Mechanisms of data availability:** After approval of proposal to Chief Investigator and corresponding author NL.
